# Supplementary material for: Prevalence and persistence of depression among undergraduate medical students: a longitudinal study at one UK medical school
Source: PubMed Central journal article supplement — BMJ Open. 2012 Aug 9;2(4):e001519. doi: 10.1136/bmjopen-2012-001519 (PMC3425899; doi:10.1136/bmjopen-2012-001519), 2012-08-09
Supplement: bmjopen-2012-001519.draft_revisions.pdf [file bmjopen-2012-001519.draft_revisions.pdf]

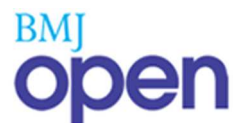

**Prevalence and persistence of depression among  
undergraduate medical students: a longitudinal study in one  
UK medical school.**

|                                 |                                                                                                                                                                                                                                                                                                               |
|---------------------------------|---------------------------------------------------------------------------------------------------------------------------------------------------------------------------------------------------------------------------------------------------------------------------------------------------------------|
| Journal:                        | <i>BMJ Open</i>                                                                                                                                                                                                                                                                                               |
| Manuscript ID:                  | bmjopen-2012-001519                                                                                                                                                                                                                                                                                           |
| Article Type:                   | Research                                                                                                                                                                                                                                                                                                      |
| Date Submitted by the Author:   | 22-May-2012                                                                                                                                                                                                                                                                                                   |
| Complete List of Authors:       | Quince, Thelma; University of Cambridge, Medical School<br>Wood, Diana; University of Cambridge, School of Clinical Medicine<br>Parker, Richard; University of Cambridge, Department of Public Health and Primary Care<br>Benson, John; University of Cambridge, Department of Public Health and Primary Care |
| <b>Primary Subject Heading</b>: | Medical education and training                                                                                                                                                                                                                                                                                |
| Secondary Subject Heading:      | Mental health                                                                                                                                                                                                                                                                                                 |
| Keywords:                       | Undergraduate medical students, Depression, Longitudinal study, Medical education                                                                                                                                                                                                                             |
|                                 |                                                                                                                                                                                                                                                                                                               |

SCHOLARONE™  
Manuscripts

1  
2  
3 TITLE PAGE

4 Prevalence and persistence of depression among undergraduate medical students: a  
5 longitudinal study at one UK medical school.  
6  
7

8  
9  
10 CORRESPONDING AUTHOR

11 Dr Thelma A Quince.  
12 Primary Care Unit  
13 Department of Public Health and Primary Care  
14 University of Cambridge  
15 Institute of Public Health  
16 Forvie Site  
17 Cambridge CB2 0SR  
18 Email: [taq1000@medschl.cam.ac.uk](mailto:taq1000@medschl.cam.ac.uk)  
19 Tel: 01223 768266  
20 Fax: 01223 762515  
21  
22

23 Dr Diana F Wood  
24 School of Clinical Medicine  
25 University of Cambridge  
26 Cambridge  
27

28  
29 Mr Richard A Parker  
30 Primary Care Unit  
31 Department of Public Health and Primary Care  
32 University of Cambridge  
33 Cambridge  
34

35 Dr John Benson  
36 Primary Care Unit  
37 Department of Public Health and Primary Care  
38 University of Cambridge  
39  
40

41  
42 KEY WORDS

43  
44 Undergraduate medical students, Depression, Longitudinal study, Medical education  
45  
46

47 WORD COUNT: 3408  
48  
49  
50  
51  
52  
53  
54  
55  
56  
57  
58  
59  
60

## ARTICLE SUMMARY

### Article focus:

- What is the prevalence of depression amongst male and female medical students?
- Does prevalence of depression increase or decrease during the course?
- For those affected, is depression persistent?

### Key messages:

- Although prevalence of depression amongst medical students was not higher than that found in comparable groups a significant minority of students displayed depression but the majority of these did so only on one occasion.
- Prevalence was not found to increase over time.
- Although the majority of students who demonstrated depression did so on only one occasion mechanisms are needed to identify and support depressed students

### Strengths and limitations of this study:

#### Strengths

- Data obtained from students in all six years of medical undergraduate training.
- Use of validated survey instrument allowing comparisons with comparable groups.
- Results of missing value analysis together with response rates indicate generalisability of study results to institution in which study conducted.

#### Limitations

- Study undertaken in one UK medical school undertaking a traditional medical course limits generalisability.
- Course structure results in only half of students in the Core Science component being able to transfer to Clinical component so limiting longitudinal nature of study.
- Attrition of response rate.
- Use of single simple self-report instrument.

## ABSTRACT

Objectives: To determine amongst male and female medical students the prevalence of depression, whether prevalence changes over time, and for students affected by depression, whether it persists.

Design: Longitudinal study comprising annual questionnaire surveys which included the depression subscale (HADS-D) of the Hospital Anxiety and Depression Scale.

Participants: Between 2007 and 2010, 1112 students entering Year 1 and 542 students entering Year 4 (the first years of Core Science and Clinical components respectively).

Methods: We analysed separately for men and women, mean HADS-D scores, the proportions whose scores indicated depression at different time-points and for students maintaining participation, the number of occasions on which their HADS-D scores indicated depression.

Results: Data provided by 725 Core Science and 364 Clinical students indicated no significant gender differences in median HADS-D scores. The range of mean HADS-D scores amongst Core Science students was 3.34-3.49 and 2.16-2.91 amongst Clinical students. A small increase was found amongst male Clinical students [time coefficient 0.33 (95% CI 0.11- 0.55)] but not amongst women. No increase in mean HADS-D scores was observed amongst Core Science students.

Prevalence of depression varied from 2.2% to 14.8%. Prevalence was not found to increase over time. 220 Core Science and 150 Clinical students maintained participation, of these 18.2% and 10.6% respectively recorded HADS-D scores indicating depression on at least one occasion. Of 56 students recording depression at some point, 37 did so only once.

### Conclusions

Amongst the medical students studied prevalence of depression was not higher than that

1  
2 found for comparable groups. However in some years a significant minority displayed  
3  
4 depression and amongst men approaching the end of clinical studies depression scores  
5  
6 increased. Gender differences in respect of depression scores and prevalence were  
7  
8 minimal. Mechanisms are needed to identify and support students suffering from  
9  
10 depression, particularly those with persistent low mood.  
11  
12  
13  
14  
15  
16  
17  
18  
19  
20  
21  
22  
23  
24  
25  
26  
27  
28  
29  
30  
31  
32  
33  
34  
35  
36  
37  
38  
39  
40  
41  
42  
43  
44  
45  
46  
47  
48  
49  
50  
51  
52  
53  
54  
55  
56  
57  
58  
59  
60

For peer review only

## MAIN TEXT

**INTRODUCTION**

Psychological wellbeing is important for medical students, for the patients they meet and for their future medical practice.[1- 4] Medical students with depression more commonly consider dropping out of their course.[5] Among newly qualified physicians associations have been found between depressive symptoms and increasing cynicism, self-perceived medical errors and lower levels of self-rated health.[6-8] As their careers progress, physicians have elevated rates of suicide compared to the general population.[9-12] Patient care is affected by psychological distress amongst physicians: poor communication, diminished quality of care and medical errors have been found to be associated with physician stress.[13,14]

Physicians are more likely to experience depression compared to the general population. [9-12] However, the prevalence of depression among medical students varies, depending on age, stage of training, methods of measurement and location.[15] The use of different study instruments limits the extent to which medical students can be compared directly with similarly aged populations. Even where valid comparisons have been made evidence remains conflicting.[16-20]

Gender differences in depression have been found in both practicing and newly qualified physicians, which mirror epidemiological studies indicating that depression is more common amongst women than men.[21] A study of US residents found that 45% of women compared to 32% of men reported 4 or 5 depressive symptoms.[6] Most, but not all studies conducted amongst medical students, using various instruments, show a similar pattern.[15,20,22,23]

The prevailing view is that depression rises during undergraduate medical education and that this rise is more pronounced among women.[15,20,24] However, this pattern is not

1  
2  
3 universally reported: studies amongst some medical student populations, show levels of  
4  
5 depression fall between years 1 and 2 and between preclinical and clinical stages of  
6  
7 training.[22,23] Longitudinal studies in the UK and Sweden suggest that some students  
8  
9 repeatedly experience psychological distress during medical training,[25,26] but few  
10  
11 studies have examined whether depression for an individual student is persistent.

12  
13 The School of Clinical Medicine at the University of Cambridge is engaged in a study  
14  
15 of factors in undergraduate education which may influence the quality of patient care  
16  
17 provided by students in their subsequent medical practice. We regard student depression  
18  
19 as one such factor. In October 2007, we began a longitudinal study involving all  
20  
21 students coming to Cambridge to study medicine. This paper reports the findings in  
22  
23 respect of three questions concerning male and female medical students:  
24  
25

- 26 1] What is the prevalence of depression?
  - 27 2] Does prevalence of depression increase or decrease during the course?
  - 28 3] For those affected, is depression persistent?
- 29  
30  
31  
32  
33  
34  
35

## 36 **METHODS**

### 37 **Participants**

38  
39 The medical course at Cambridge comprises a Core Science component (Years 1-3)  
40  
41 during which students learn core medical science with a small element of clinical  
42  
43 experience leading to a primary BA degree, and a Clinical component (Years 4-6).  
44  
45 Around 280 students, typically aged 18 – 19 years, enter Year 1. At the end of Year 3,  
46  
47 approximately half continue into the Clinical component in Cambridge. From  
48  
49 September 2007 – September 2010, all students entering Years 1 and 4 (the first years  
50  
51 of the Core Science and Clinical components respectively) were invited to participate in  
52  
53 a longitudinal study comprising annual questionnaire surveys. Students entering the  
54  
55  
56  
57  
58  
59  
60

1  
2  
3 Clinical component in 2010 comprised those students who had entered the Core Science  
4  
5 component in 2007 and who remained in Cambridge.  
6

### 7 **Outcome Measure**

8  
9 We measured depression using the depression subscale (HADS-D) of the Hospital  
10  
11 Anxiety and Depression Scale.[27] HADS is a self-report instrument initially developed  
12  
13 to evaluate the presence and severity of anxiety and depression in general medical  
14  
15 populations. It is regarded as a useful tool for identifying those with emotional distress  
16  
17 and has good psychometric properties.[28,29] HADS-D has been widely used in the UK  
18  
19 among members of the general population,[30] among young adults within the general  
20  
21 population,[31] with undergraduates,[32,33] medical students,[16,34,35] and medical  
22  
23 practitioners.[36,37]  
24  
25

26  
27 HADS-D comprises seven items expressed both positively and negatively, giving a  
28  
29 maximum score of 21. It has widely recognised norms relating to depression: scores of  
30  
31 0-7 are regarded as “normal”, scores of 8-10 indicate “possible” depression and scores  
32  
33 of 11 and over indicate “probable” depression. The HADS-D norm of greater than or  
34  
35 equal to 8 has been shown to have a sensitivity of 0.82 (95% CI 0.73-0.89) and a  
36  
37 specificity of 0.74 (95% CI 0.60-0.84).[29] A study of UK undergraduates comparing  
38  
39 results for HADS-D with interview data concluded that the HADS-D scale was a  
40  
41 reasonably accurate indicator of depressive conditions in university students at the  
42  
43 recommended cut-offs.[38]  
44  
45

### 46 **Procedures**

47  
48 Students in years 1-5 received questionnaires during the first week of each new  
49  
50 academic year (September / October). Students in Year 6 received questionnaires in  
51  
52 January of their final year, prior to final examinations in June. We used a paper-based  
53  
54 questionnaire for all students in 2007 and 2008 and for Clinical students in 2009. We  
55  
56 used an online questionnaire for Core Science students in 2009 and for all students in  
57  
58  
59  
60



1  
2  
3 2010 (table 1). Participation was voluntary. Questionnaires were labelled by study  
4  
5 number only. A study data manager (who had no access to results) sent one reminder to  
6  
7 students after 2 weeks. A small prize was awarded annually by lottery to a small number  
8  
9 of participants. The study received approval from the University of Cambridge  
10  
11 Psychology Ethics Committee.  
12

### 13 **Analysis**

#### 14 Overall Approach

15  
16 We took a HADS-D of greater than or equal to 8 to indicate depression. We set  
17  
18 statistical significance at the 5% level ( $p < 0.05$ ) for all analyses. Only about half of the  
19  
20 Core Science students present in Years 1-3 remained in Cambridge for Years 4-6,  
21  
22 yielding small numbers for analysis across all six years (Figure 1). For this reason, we  
23  
24 analysed data separately for students from the Core Science and Clinical components.  
25  
26 For study questions 1 and 2 (prevalence of depression) we included all students  
27  
28 completing questionnaires between 2007 and 2011. For study question 3 (persistence of  
29  
30 depression) we included students entering either the Core Science or the Clinical  
31  
32 component in 2007, 2008 and 2009, who maintained their participation for all years of  
33  
34 their respective course.  
35  
36  
37  
38

#### 39 Response bias

40  
41 For study questions 1 and 2, (prevalence of depression) we undertook missing value  
42  
43 analyses for men and women separately, using logistic regression to determine whether  
44  
45 HADS-D on entry predicted subsequent study participation. Outcome variables were  
46  
47 missing values (yes or no) for HADS-D at Years 2 and 3 for students entering year 1  
48  
49 and Years 5 and 6 for students entering year 4. The explanatory variable was HADS-D  
50  
51 at Year 1 for Core Science students and Year 4 for Clinical students. We included 'year  
52  
53 of course entry' as an explanatory factor, to adjust for student cohort. Students entering  
54  
55 in 2010 were considered to have missing subsequent participation if they did not  
56  
57  
58  
59  
60

1  
2  
3  
4  
5  
6  
7  
8  
9  
10  
11  
12  
13  
14  
15  
16  
17  
18  
19  
20  
21  
22  
23  
24  
25  
26  
27  
28  
29  
30  
31  
32  
33  
34  
35  
36  
37  
38  
39  
40  
41  
42  
43  
44  
45  
46  
47  
48  
49  
50  
51  
52  
53  
54  
55  
56  
57  
58  
59  
60

respond in Year 2 / Year 5. We calculated odds ratios corresponding to the increased risk of non-response for every 1 unit increase in HADS-D at course entry, with 95% confidence intervals for odds ratios and p-values.

For study question 3 (persistence of depression) within each component we undertook separate t tests to examine whether there was any difference in the mean scores of those who maintained their participation and those who did not.

#### Detailed Analyses

For study question 1 (prevalence of depression) we measured separately for men and women, at each point in the course, mean HADS-D and the proportion with HADS-D scores  $\geq 8$  indicating depression. We compared median HADS-D amongst men and women using non-parametric tests (Mann Whitney U tests) and the proportions of men and women whose HADS-D indicated depression (Chi-squared tests).

For study question 2 (prevalence of depression over time) we undertook regression analyses separately for men and women, using a 'Generalised Estimating Equations' (GEE) method. We chose the GEE method because many students had repeated data, the HADS-D scores were skewed, and we did not want to make any full distributional assumptions. The model assumed a general (unstructured) correlation structure. In order to adjust for effect of student year of entry, we included this as an explanatory factor variable. To test the robustness of our model we applied a sensitivity analysis to the outcome variables, removing outliers more than 3 standard deviations away from the mean.

For study question 3 (persistence of depression) we examined separately for men and women the number of occasions on which individual students' HADS-D score indicated depression. Within each component we examined whether the proportions of men and women whose score indicated depression differed (i) on any occasion, (ii) on only one occasion, or (iii) on more than one occasion. Given the small sample size we used

Newcombe's method (39) with R software (40) to calculate differences in independent (i.e. unpaired) proportions together with 95% confidence intervals.

## RESULTS

### Participants

In total 725 Core Science and 364 Clinical students participated in the study. Table 1 shows the number of entrants to the Core Science and Clinical components for each year of entry (2007-2010) and those participating each year and providing depression data.

Table 1: Number of participating students providing depression scores at each year for each component of the course.

| <b>Core Science Component</b>                                   |                          |                                |                                |                                |
|-----------------------------------------------------------------|--------------------------|--------------------------------|--------------------------------|--------------------------------|
| Participating students in Each Year of Course (% of year group) |                          |                                |                                |                                |
| <i>(% of female)</i>                                            |                          |                                |                                |                                |
|                                                                 | Total number of entrants | Year of component              |                                |                                |
|                                                                 |                          | Year 1                         | Year 2                         | Year 3                         |
| Students entering 2007                                          | 266<br>(52.2%)           | 182 (68.4%)<br>(51.1%)         | 142 (53.4%)<br>(52.8%)         | 121 (45.5%)<br>(53.7%)         |
| Students entering 2008                                          | 283<br>(45.8%)           | 139 (49.1%)<br>(58.3%)         | 87 (30.7%)<br>(60.9%)          | 78 (27.6%)<br>(60.2%)          |
| Students entering 2009                                          | 281<br>(48.9%)           | 156 (55.5%)<br>(53.2%)         | 94 (33.4%)<br>(53.2%)          | 84 (29.9%)<br>(57.1%)          |
| Students entering 2010                                          | 282<br>(46.3%)           | 188 (67.0%)<br>(50.5%)         | 107 (37.9%)<br>(50.5%)         |                                |
| <b>Total</b>                                                    | <b>1112<br/>(48.0%)</b>  | <b>665 (59.8%)<br/>(52.9%)</b> | <b>430 (38.7%)<br/>(53.9%)</b> | <b>283 (25.4%)<br/>(56.5%)</b> |
| <b>Clinical Component</b>                                       |                          |                                |                                |                                |
| Participating students in Each Year of Course (% of year group) |                          |                                |                                |                                |
| <i>(% of female)</i>                                            |                          |                                |                                |                                |
|                                                                 | Total number of entrants | Year of component              |                                |                                |
|                                                                 |                          | Year 4                         | Year 5                         | Year 6                         |
| Students entering 2007                                          | 135<br>(61.1%)           | 102 (75.6%)<br>(62.7%)         | 82(60.7%)<br>(67.1%)           | 76(56.3%)<br>(67.1%)           |
| Students entering 2008                                          | 135<br>(44.3%)           | 97(71.9%)<br>(54.6%)           | 70(51.9%)<br>(58.6%)           | 57(42.2%)<br>(63.2%)           |
| Students entering 2009                                          | 135<br>(49.6%)           | 70(51.9%)<br>(46.4%)           | 47(34.8%)<br>(45.7%)           | 49 (36.3%)<br>(45.8%)          |
| Students entering 2010                                          | 137<br>(53.3%)           | 68(49.6%)<br>(50.0%)           | 63(46.0%)<br>(55.6%)           |                                |
| <b>Total</b>                                                    | <b>542<br/>(52.0%)</b>   | <b>337 (62.2%)<br/>(54.3%)</b> | <b>262 (48.3%)<br/>(58.0%)</b> | <b>182 (33.6%)<br/>(59.9%)</b> |

## Response Bias

Table 2: Missing value analysis: Logistic regression results presented as odds ratios, 95% confidence intervals and p-values for relationship between HADS-D on entry and subsequent study participation, adjusting for student cohort

| Depression (HADS-D)             | Men                 | Women               |
|---------------------------------|---------------------|---------------------|
| Core Science component students |                     |                     |
| odds ratio (95% CI)             | 1.05 (0.95 to 1.16) | 1.08 (0.99 to 1.18) |
| p values                        | p=0.35              | p=0.08              |
| Clinical component students     |                     |                     |
| odds ratio(95% CI)              | 1.07 (0.91 to 1.25) | 0.95 (0.79 to 1.15) |
| p values                        | p=0.43              | p=0.62              |

Table 2 shows the results of the missing value analysis for study questions 1 and 2. For students in both components of the course, there was no significant relationship between HADS-D on entry and subsequent study participation. For study question 3, no statistically significant difference in mean HADS-D was found between students who maintained their participation and those who did not (analyses not shown).

### Prevalence of Depression amongst men and women (Study question 1)

Table 3 shows, at each point in the course, mean HADS-D and the proportion of students whose HADS-D indicated depression.

#### Core Science component

Mean HADS-D ranged between 3.34 and 3.49. The proportion of students whose HADS-D scores indicated depression ranged between 5.7% (5.8% among men and 5.7% among women) and 10.6% (14.8% among men and 7.5% among women).

#### Clinical component

Mean HADS-D ranged between 2.16 and 2.91. The proportion of students whose HADS-D scores indicated depression ranged between 2.7% (3.2% among men and 2.2% among women) and 8.2% (5.6% among men and 10.0% among women).

Table 3 shows comparisons, at each point in the medical course, between median HADS-D amongst men and women (Mann Whitney U tests). There were no significant gender differences in either course component.

Table 3: Mean HADS-D (Standard deviation) and percentages of participants whose HADS-D indicated depression by gender for each year of course within each component. Non-parametric gender comparison of means and Chi-squared gender comparisons of percentages.

| Year                            | Mean scores            |                        |                          | Mann Whitney U       |
|---------------------------------|------------------------|------------------------|--------------------------|----------------------|
|                                 | All Mean (SD)          | Men Mean (SD)          | Women Mean (SD)          |                      |
| Core science component students |                        |                        |                          |                      |
| Yr 1<br>(n=665/313/352)         | 3.34 (2.36)            | 3.22 (2.24)            | 3.44 (2.47)              | p=0.339              |
| Yr 2<br>(n=429/197/232)         | 3.49 (2.75)            | 3.29 (2.77)            | 3.66 (2.76)              | p=0.120              |
| Yr 3<br>(n=282/122/160)         | 3.35 (2.85)            | 3.77 (3.16)            | 3.04 (2.56)              | p=0.062              |
| Clinical component students     |                        |                        |                          |                      |
| Yr 4<br>(n=337/157/180)         | 2.16 (2.08)            | 2.23 (2.06)            | 2.10 (2.11)              | p=0.474              |
| Yr 5<br>(n=260/109/151)         | 2.65 (2.51)            | 2.82 (2.66)            | 2.52 (2.40)              | p=0.398              |
| Yr 6<br>(n=182/72/110)          | 2.91(2.92)             | 3.08 (2.88)            | 2.79 (2.96)              | p=0.311              |
| Year                            | Prevalence             |                        |                          | X <sup>2</sup>       |
|                                 | All % Depression (≥ 8) | Men % Depression (≥ 8) | Women % Depression (≥ 8) |                      |
| Core science component students |                        |                        |                          |                      |
| Yr 1<br>(n=665/313/352)         | 5.7%                   | 5.8%                   | 5.7%                     | <sup>a</sup> p=0.969 |
| Yr 2<br>(n=429/197/232)         | 8.4%                   | 7.1%                   | 9.5%                     | <sup>a</sup> p=0.376 |
| Yr 3<br>(n=282/122/160)         | 10.6%                  | 14.8%                  | 7.5%                     | <sup>a</sup> p=0.050 |
| Clinical component students     |                        |                        |                          |                      |
| Yr 4<br>(n=337/157/180)         | 2.7%                   | 3.2%                   | 2.2%                     | <sup>a</sup> p=0.585 |
| Yr 5<br>(n=260/109/151)         | 5.8%                   | 6.4%                   | 5.3%                     | <sup>a</sup> p=0.701 |
| Yr 6<br>(n=182/72/110)          | 8.2%                   | 5.6%                   | 10.0%                    | <sup>a</sup> p=0.286 |

<sup>a</sup> Comparison of men and women in respect of normal HADS-D (score ≤ 7) and HADS-D indicating depression (score ≥ 8)

Table 3 also shows the proportions of men and women whose HADS-D indicated depression (Chi-squared tests). Amongst Core Science component students, significantly more men than women in year 3 recorded HADS-D scores indicating depression, but there were no differences in other years. There were no significant differences between men and women in the Clinical component.

### Prevalence of depression amongst men and women over time (Study Question 2)

Table 4 shows the results of the GEE models used in this analysis. These are supported by the finding reported above that missing values were not significantly dependent on initial depression levels (table 2). The time coefficient resulting from a GEE model should be interpreted as representing a population-averaged effect rather than an individual student-level effect.

Table 4: Linear time coefficients resulting from GEE regression analyses on the outcome variable HADS-D, adjusting for student year of entry, presented with 95% confidence intervals.

|                                                                                         | Men                     | Women                    |
|-----------------------------------------------------------------------------------------|-------------------------|--------------------------|
| Core science component students<br>Depression (HADS-D)<br>Time coefficients<br>(95% CI) | 0.20<br>(-0.03 to 0.43) | -0.11<br>(-0.31 to 0.08) |
| Clinical component students<br>Depression (HADS-D)<br>Time coefficients<br>(95% CI)     | 0.33<br>(0.11 to 0.55)  | 0.17<br>(-0.04 to 0.39)  |

All results were similar after removal of outliers more than 3 SD from the mean.

#### Core Science component

The results indicate no significant difference, amongst either men or women, in HADS-D scores over time. Sensitivity analysis (removal of outliers) produced similar results.

#### Clinical component

A very small but statistically significant increase in HADS-D over time was found amongst men. No significant difference over time was found amongst women.

Sensitivity analysis (removal of outliers) produced similar results.

### Persistence of Depression amongst men and women (Study Question 3)

Table 5 shows the prevalence of depression recorded by students who maintained their participation throughout the three years of each course component.

Table 5: Prevalence of depression recorded by repeat participants.

|                                        | All                          | Men                         | Women                        | Differences in proportion women-men (95% CI) |
|----------------------------------------|------------------------------|-----------------------------|------------------------------|----------------------------------------------|
| <b>Core science component students</b> | n=220<br>(% of participants) | n=96<br>(% of participants) | n=124<br>(% of participants) |                                              |
| On any occasion                        | 40<br>(18.2%)                | 17<br>(17.7%)               | 23<br>(18.5%)                | 0.008<br>(-0.10 to 0.11)                     |
| On only one occasion                   | 29<br>(13.2%)                | 9<br>(9.4%)                 | 20<br>(16.1%)                | 0.07<br>(-0.03 to 0.15)                      |
| On more than one occasion              | 11<br>(5.0%)                 | 8<br>(8.3%)                 | 3<br>(2.4%)                  | -0.06<br>(-0.13 to 0.001)                    |
| <b>Clinical component students</b>     | n=150<br>(% of participants) | n=59<br>(% of participants) | n=91<br>(% of participants)  |                                              |
| On any occasion                        | 16<br>(10.6%)                | 5<br>(8.5%)                 | 11<br>(12.1%)                | 0.04<br>(-0.08 to 0.13)                      |
| On only one occasion                   | 8<br>(5.3%)                  | 3<br>(5.1%)                 | 5<br>(5.5%)                  | 0.004<br>(-0.09 to 0.08)                     |
| On more than one occasion              | 8<br>(5.3%)                  | 2<br>(3.4%)                 | 6<br>(6.6%)                  | 0.03<br>(-0.06 to 0.11)                      |

#### Core Science component

Amongst the 96 men and 124 women who maintained their participation, 40 students (17 men and 23 women) recorded at least one HADS-D score indicating depression. Of these, 29 (9 men and 20 women) did so on only one occasion; 9 (6 men and 3 women) did so on two occasions. Two men recorded scores indicating “possible” depression throughout the Core Science course component.

#### Clinical component

Amongst the 59 men and 91 women who maintained their participation, 16 students (5 men and 11 women) recorded at least one HADS-D score indicating depression. Of these, 8 (3 men and 5 women) did so on one occasion; 6 (all women) did so on two

1  
2 occasions. Two men recorded scores indicating “possible” depression throughout the  
3  
4 Clinical course component.  
5

6  
7 Table 5 also shows the results of comparisons between men and women in respect of  
8  
9 transitory or persistent depression. There were no significant gender differences in  
10  
11 either course component.  
12

## 13 **DISCUSSION**

14  
15 Amongst groups of male and female medical students in Cambridge, the prevalence of  
16  
17 depression varied from 2.2% to 14.8%. No significant changes in mean depression  
18  
19 scores were observed amongst Core Science component students or amongst women in  
20  
21 the Clinical component. A statistically significant increase in mean depression scores  
22  
23 was found for men during the Clinical component. However, this increase was  
24  
25 extremely small when considered against the 21 points of the HADS-D scale. Most  
26  
27 students who demonstrated depression during the Core Science component did so on  
28  
29 only one occasion. In the Clinical component, although few students experienced  
30  
31 depression, half did so on more than one occasion. We found no evidence that women  
32  
33 were more likely than men to experience depression, either on one occasion or  
34  
35 persistently.  
36  
37

38  
39 Our study obtained data on depression from students in all 6 years of medical training.  
40  
41 In the Core Science component, for each year of the course between 25.4% and 59.8%  
42  
43 of those eligible participated. Comparable figures for the Clinical component were  
44  
45 33.6% to 62.2%. Almost 27% of Core Science students and 37% of Clinical students  
46  
47 entering between 2007 and 2009 participated on all occasions during their respective  
48  
49 course components, allowing longitudinal observations to be made. These participation  
50  
51 rates, allied with missing data analyses indicating that initial scores did not predict later  
52  
53 non-response, support the generalisability of our results to the population of medical  
54  
55  
56  
57  
58  
59  
60



1  
2  
3 students at the University of Cambridge. Where possible these results are related to  
4  
5 existing literature using HADS-D in order to allow direct comparison.

6  
7 Mean HADS-D scores recorded by students in our study ranged from 2.16 (SD 2.08) for  
8  
9 Clinical students in year 4 of the course, to 3.49 (SD 2.75) for Core Science students in  
10  
11 year 2. These are roughly similar to mean scores reported for comparable groups:  
12  
13 scores from 2.68 to 7.5 for medical students elsewhere,[17,19,34] and from 2.33 to 5.2  
14  
15 for non-medical undergraduate populations.[41- 43]

16  
17 Mean scores may not reflect the prevalence of significant depression. Using the HADS-  
18  
19 D score of  $\geq 8$ , we found the prevalence of depression ranged from 2.7% for Clinical  
20  
21 students in year 4 of the course, to 10.6% for Core Science students in year 3.

22  
23 Prevalence of depression using a similar cut-off score amongst comparable groups has  
24  
25 been found to vary from 9.5% to 29% for medical students,[16,17,19] and from 3.8% to  
26  
27 18% for non-medical undergraduates.[38,41] Studies in the general population in  
28  
29 Norway and the UK have reported a prevalence of 8% and 12% respectively,[30,44]  
30  
31 whilst a study of people aged 18-25 reported a prevalence of 12% amongst men and  
32  
33 18% amongst women.[31] Our results suggest that Cambridge medical students do not  
34  
35 have a higher prevalence of depression than students in general or comparable non-  
36  
37 student members of the general population. Other work, investigating the suicide rate  
38  
39 amongst students at the University of Cambridge over the period 1970-1996 also found  
40  
41 that rates were similar to comparable age groups in the general population.[45]

42  
43 Although studies involving similarly aged members of the general population have  
44  
45 reported a higher prevalence of depression amongst women compared to men,[31,44]  
46  
47 we found no significant gender differences in either mean HADS-D or prevalence of  
48  
49 depression in any year of the course. This replicates previous findings using the HADS  
50  
51 with other undergraduates including medical and dental students.[46,47]

1  
2  
3 Turning to the question of whether psychological well-being deteriorates during  
4 university medical education a UK study of non-medical undergraduates found a  
5 significant increase in the proportion recording depression between the period  
6 immediately prior to the start of the course and the middle of the second academic  
7 year.[33] Few studies have examined the persistence of depression within individual  
8 students over time. In our study, regression analyses indicated no significant change for  
9 either men or women throughout the equivalent Core Science component of the course.  
10 Analysis of students in the Clinical component indicated a very small increase in mean  
11 scores for depression for men but not for women. These minor increases in mean  
12 depression scores may be related to the approach of finals examinations, or they may  
13 presage the known increase in depression seen amongst practising doctors.  
14 For many students, the experience of depression was transient. Among repeat  
15 participants, 40 Core Science and 16 Clinical students recorded HADS-D scores  
16 indicating depression at some point. Of these 56 students, 37 did so on only one  
17 occasion. Nevertheless, 19 students (11 Core Science and 8 Clinical) showed evidence  
18 of repeated depression, with four men (2 in each component of the course) doing so in  
19 all three years of their respective course component. We found no significant difference  
20 in transient or persistent raised levels of depression between men and women.  
21 The authors are not aware of any other studies using HADS-D of medical students  
22 against which to set these particular findings. However, their key implication is that  
23 whilst overall persistence of depression is low, there exists a small, important minority  
24 of students for whom depression is an ongoing experience. It is vital for medical schools  
25 to recognise and support all students experiencing depression, but in particular to  
26 consider how best to encourage this especially vulnerable group to seek help, given the  
27 evidence that suggests that they are reluctant to do so.[1,26,48,49]

1  
2  
3 The HADS-D is a well validated and widely used self-report instrument. The  
4  
5 procedures for administering the survey were created to ensure anonymity and  
6  
7 confidentiality.[50] This study is limited by being based on one UK university,  
8  
9 providing a “traditional” course with a collegiate pastoral support structure. There may  
10  
11 have been a systematic difference between those participating and those not  
12  
13 participating (i.e. a non response bias) which may have affected our results. However,  
14  
15 the missing value analysis supports the view that those continuing to participate could  
16  
17 be considered representative of all student entrants in their year group and that  
18  
19 continued participation was not influenced by scores for HADS-D recorded at the  
20  
21 beginning of participation. We cannot exclude the possibility of an association between  
22  
23 an unobserved change in depression and the missing values.  
24  
25

26  
27 We tested for a linear relationship between year of course and depression which rests on  
28  
29 the assumption that depression increases or decreases gradually over time. In reality  
30  
31 this may not have been the case: mean scores could rise during one year and then  
32  
33 decline during the next year. Unfortunately our sample size was too small and number  
34  
35 of time points too few to test for quadratic or other polynomial relationships between  
36  
37 individual course years and depression, but future studies may like to consider this.  
38  
39

40  
41 Future work should investigate the generalisability of these results to other medical  
42  
43 schools in the UK and, in order to extend the relevance of findings to future patient care,  
44  
45 the relationship between depression during undergraduate medical education and  
46  
47 “burnout” after qualification. Further work is needed on identifying both transient and  
48  
49 repeated experiences of depression among medical students and understanding possible  
50  
51 causes related to course design and students’ experience of it. For example, studies of  
52  
53 students have found depressive symptoms to be related to prior mental health  
54  
55 problems,[49] personality aspects such as maladaptive perfectionism,[51]and strong  
56  
57 feelings of altruism and empathy.[52]  
58  
59  
60

## CONCLUSIONS

Overall, only a small proportion of the student body experienced depression. These findings do not support the view that medical students exhibit a higher prevalence of depression than other comparable groups or that differences in mean depression score or prevalence exist between men and women. Nevertheless, depression may start to become more prevalent as medical qualification approaches and a small number of students who experience depression do not recover from one year to the next. It is important that mechanisms should be in place to identify and support all students suffering from depression, but particularly the very few with persistent low mood. As part of this process, it remains important to challenge the stigma of mood disorder amongst health professionals to encourage students experiencing difficulty to seek and receive appropriate help.

## ACKNOWLEDGEMENTS

The authors are indebted to James Brimicombe, Data Manager of the Primary Care Unit, Department of Public Health and Primary Care, University of Cambridge, for his administration of the online survey.

## COMPETING INTERESTS STATEMENT

All authors have completed the Unified Competing Interest form at [www.icmje.org/coi\\_disclosure.pdf](http://www.icmje.org/coi_disclosure.pdf) (available on request from the corresponding author) and declare: no support from any organisation for the submitted work; no financial relationships with any organisations that might have an interest in the submitted work in the previous 3 years; no other relationships or activities that could appear to have influenced the submitted work.

## CONTRIBUTORSHIP STATEMENT

TQ, JB and DW were responsible for the conception and design of the study. TQ coordinated the study and managed the data collection. TQ and RP did the analyses, JB and DW contributed to interpretation of the findings. TQ wrote the first draft of the

1  
2  
3 manuscript. All authors had full access to all data and all were involved in critical  
4 revision of the manuscript.  
5  
6

## 7 FUNDING STATEMENT

8  
9 This research received no specific grant or other financial support from any funding  
10 agency in the public, commercial or not-for-profit sectors.  
11  
12

## 13 ETHICAL APPROVAL

14  
15 The study was approved by the University of Cambridge Psychology Ethics Committee.  
16  
17  
18  
19  
20  
21  
22  
23  
24  
25  
26  
27  
28  
29  
30  
31  
32  
33  
34  
35  
36  
37  
38  
39  
40  
41  
42  
43  
44  
45  
46  
47  
48  
49  
50  
51  
52  
53  
54  
55  
56  
57  
58  
59  
60

## REFERENCE LIST

- 1 Tyssen R, Vaglum P, Grønvold NT, et al. Factors in medical school that predict postgraduate mental health problems in need of treatment. A nationwide and longitudinal study. *Med Educ* 2001;**35**:110-120.
- 2 Royal College of Psychiatrists. The mental health of students in higher education. Council Report CR112 January 2003, Royal College of Psychiatrists, London:2003.
- 3 Tyssen R, Hem E, Vaglum P, et al. The process of suicidal planning among medical doctors: predictors in a longitudinal Norwegian sample. *J Affect Disord* 2004;**80**:191-198.
- 4 Dunn LB, Iglewicz A, Moutier C, A conceptual model of students' well-being: Promoting resilience and preventing burnout. *Acad Psychiatry* 2008;**32**:44-53.
- 5 Dyrbye LN, Thomas MR, Power DV, et al. Burnout and serious thoughts of dropping out of medical school: A multi-institutional study. *Acad Med* 2010a;**85**:94-102.
- 6 Collier VU, McCue JD, Markus A, et al. Stress in medical residency: Status Quo after a decade or reform? *Ann Intern Med* 2002;**136**:384-390.
- 7 West CP, Tan AD, Habermann TM, et al. Association of resident fatigue and distress with perceived medical errors. *JAMA* 2009;**302**:1294-1300.
- 8 Yi MS, Mrus JM, Mueller CV, et al. Self rated health of primary care house officers and its relationship to psychological and spiritual well-being. *BMC Med Educ* 2007;**7**:9.
- 9 Lindeman S, Laara E, Hakko H, et al. A systematic review on gender-specific suicide mortality in medical doctors. *Br J Psychiatry* 1996;**168**:274-93.
- 10 Schernhammer ES, and Colditz GA, Suicide rates among physicians: A quantitative and gender assessment (Meta-analysis). *Am J Psychiatry* 2004;**161**:2295-2303.
- 11 Meltzer H, Griffiths C, Brock A, et al. Patterns of suicide by occupation in England and Wales. *Br J Psychiatry* 2008;**193**:73-76.

1  
2  
3 12 Tyssen R, Hem E, Gude T, et al. Lower life satisfaction in physicians compared with  
4 a general population sample: A 10-year longitudinal nationwide study of course and  
5 predictors. *Soc Psychiatry Psychiatr Epidemiol* 2009;**44**:47-54.  
6  
7

8  
9 13 Firth-Cozens J, Greenhalgh J. Doctors' perceptions of the links between stress and  
10 lowered clinical care. *Soc Sci Med* 1997;**44**:1017-1022.  
11

12  
13 14 Brown R, Dunn S, Byrnes K, et al. Doctors' stress responses and poor  
14 communication performance in simulated bad-news consultations. *Acad Med*.  
15  
16 2009;**84**:1595.  
17  
18

19  
20 15 Dyrbye LN, Thomas MR, Shanafelt TD. Systematic review of depression, anxiety  
21 and other indicators of psychological distress among US and Canadian medical  
22 students. *Acad Med* 2006;**81**:354-373.  
23  
24

25  
26 16 Pickard M, Bates L, Dorian M, et al. Alcohol and drug use in second year medical  
27 students at the University of Leeds. *Med Educ* 2000;**34**:148-150.  
28  
29

30  
31 17 Karaoglu N, Seker M., Anxiety and depression in medical students related to desire  
32 for and expectations from a medical career. *West Indian Med J* 2010;**59**:196-202.  
33  
34

35  
36 18 Curran TA, Gawley E, Casey P, et al. Depression, suicidality and alcohol abuse  
37 among medical and business students. *Ir Med J* 2009;**102**:249-252.  
38  
39

40  
41 19 Bunevicius A, Katkute A, Bunevicius R. Symptoms of anxiety and depression in  
42 medical students and in humanities students: Relationship with Big-Five personality  
43 dimensions and vulnerability to stress. *Int J Soc Psychiatry* 2008;**54**:494-501.  
44  
45

46  
47 20 Dahlin ME, Joneborg N, Runeson B. Stress and depression among medical students:  
48 a cross-sectional study. *Med Educ* 2005;**39**:594-604.  
49  
50

51  
52 21 Kessler RC. Epidemiology of women and depression. *J Affect Disord* 2003;**74**:5-13.  
53

54  
55 22 Sreeramareddy CT, Shankar PR, Binu VS, et al. Psychological morbidity, sources of  
56 stress and coping strategies among undergraduate medical students of Nepal. *BMC Med*  
57  
58 *Educ* 2007;**7**:26.  
59  
60

- 1  
2  
3 23 Mancevska S, Bozinovska L, Tecce J, et al. Depression, anxiety and substance use in  
4  
5 medical students in the Republic of Macedonia. *Bratisl Lek Listy* 2008;**109**:568-572.  
6  
7 24 Rosal MC, Ockene IS, Ockene JK, et al. A longitudinal study of students' depression  
8  
9 at one medical school. *Acad Med*. 1997;**72**:542-546.  
10  
11 25 Guthrie E, Black D, Bagalkote H, et al. Psychological stress and burnout in medical  
12  
13 students : a five-year prospective longitudinal study. *J Royal Soc Med* 1998;**91**:237-243.  
14  
15 26 Dahlin ME, Runeson B. Burnout and psychiatric morbidity among medical students  
16  
17 entering clinical training: a three year prospective questionnaire and interview based  
18  
19 study. *BMC Med Educ* 2007;**7**:6.  
20  
21 27 Zigmond AS, Snaith RP, The Hospital Anxiety and Depression Scale. *Acta Psychiatr*  
22  
23 *Scand* 1983;**67**:361-370.  
24  
25 28 Brennan C, Worrall-Davies A, McMillan D, et al. The Hospital Anxiety and  
26  
27 Depression Scale: A diagnostic meta-analysis of case-finding ability. *J Psychosom Res*  
28  
29 2010;**69**:371-378.  
30  
31 29 Bjelland I, Dahl AA, Tangen Haug T, et al. The validity of the Hospital Anxiety and  
32  
33 Depression Scale: An updated literature review. *J Psychosom Res* 2002;**52**:69-77.  
34  
35 30 Green MJ, Benzeval M. Ageing, social class and common mental disorders:  
36  
37 longitudinal evidence from three cohorts in the West of Scotland. *Psychol Med*  
38  
39 2011;**41**:565-574.  
40  
41 31 Mallen C, Mottram S, Thomas E. Birth factors and common mental health problems  
42  
43 in young adults. *Soc Psychiatr Epidemiol* 2008;**43**:325-330.  
44  
45 32 Webb E, Ashton CH, Kelly P, et al. Alcohol and drug use in UK university students.  
46  
47 *Lancet* 1996;**348**:922-5.  
48  
49 33 Andrews B, Wilding JM. The relation of depression and anxiety to life-stress and  
50  
51 achievement in students. *Br J Psychol* 2004;**95**:509-521.  
52  
53  
54  
55  
56  
57  
58  
59  
60



1  
2  
3 34 Woolf K, Cave J, McManus C, et al. 'It gives you an understanding you can't get  
4 from any book.' The relationship between medical students' and doctors' personal  
5 illness experiences and their performance: a qualitative and quantitative study. *BMC*  
6 *Med Educ* 2007;7,50.

7  
8  
9  
10  
11 35 Ashton CH, Kamali F. Personality, lifestyles, alcohol and drug consumption in a  
12 sample of British medical students. *Med Educ* 1995;29:187-192.

13  
14  
15  
16 36 Caplan RP, Stress, anxiety and depression in hospital consultants, general  
17 practitioners and senior health service managers. *BMJ* 1994;309:1261-1263.

18  
19  
20  
21 37 Chambers R, Campbell I. Anxiety and depression in general practitioners:  
22 associations with type of practice, fundholding, gender and other personal  
23 characteristics. *Fam Pract* 1996;13:170-173.

24  
25  
26  
27 38 Andrews B, Hejdenberg J, Wilding J. Student anxiety and depression: Comparison  
28 of questionnaire and interview assessments. *J Affect Disord* 2006;95:29-34

29  
30  
31  
32 39 Altman DG, Machin D, Bryant TN, et al. Proportions and their differences. In:  
33 Altman DG, Machin D, Bryant TN, Gardner MJ eds. *Statistics with confidence*. 2nd ed.  
34 London: BMJ Books, 2000:45-56.

35  
36  
37  
38 40 R Development Core Team (2011). R: A language and environment for statistical  
39 computing. R Foundation for Statistical Computing, Vienna, Austria. ISBN 3-900051-  
40 07-0, URL <http://www.R-project.org/>.)

41  
42  
43  
44 41 Skinner R, Conlon L, McDonald C. Cannabis use and non-clinical dimensions of  
45 psychosis in university students presenting to primary care. *Acta Psychiatr Scand*  
46 2011;123:21-27.

47  
48  
49  
50  
51 42 Heffernan T, Clark R, Bartholomew J, et al. Does binge drinking in teenagers affect  
52 their everyday prospective memory? *Drug Alcohol Depend* 2010;109:73-78.

53  
54  
55  
56 43 Matsudaira T, Kitamura T. Personality traits as risk factors of depression and anxiety  
57 among Japanese students. *J Clin Psychol* 2006;62:97-109.

- 1  
2  
3 44 Augestad LB, Slettemoen RP, Flanders WD. Physical activity and depressive  
4 symptoms among Norwegian adults aged 20-50. *Public Health Nurs* 2008;**25**:536-545.  
5  
6  
7 45 Collins IP, Paykel ES. Suicide amongst Cambridge University students 1970-1996.  
8  
9 *Soc Psychiatr Epidemiol* 2000;**35**:128-132.  
10  
11 46 Newbury-Birch D, Lowry RJ, Kamali F. The changing patterns of drinking. Illicit  
12 drug use, stress, anxiety and depression in dental students in a UK dental school: a  
13 longitudinal study. *Br Dent J* 2002;**192**:646-649.  
14  
15  
16 47 Caci H, Baylé FJ, Mattei V, et al. How does the Hospital Anxiety and Depression  
17 Scale measure anxiety and depression in health subjects? *Psychiatry Res* 2003;**118**:89-  
18 99.  
19  
20  
21 48 Zoccolillo M, Murphy GE, Wetzel RD. Depression among medical students. *J Affect*  
22 *Disord* 1986;**11**:91-96.  
23  
24  
25 49 Zivin K, Eisenberg D, Gollust SE, et al. Persistence of mental health problems and  
26 needs in a college student population. *J Affect Disord* 2009;**117**:180-185.  
27  
28  
29 50 Levine RE, Breitkopf CR, Sierles FS, et al. Complications associated with surveying  
30 medical student depression. *Acad Psychiatry* 2003;**27**:12-18.  
31  
32  
33 51 Enns MW, Cox BJ, Sareen J, et al. Adaptive and maladaptive perfectionism in  
34 medical students: a longitudinal investigation. *Med Educ* 2001;**35**:1034-1042.  
35  
36  
37 52 O'Connor LE, Berry JW, Weiss J, et al. Guilt, fear, submission and empathy in  
38 depression. *J Affect Disord* 2002;**71**:19-27.  
39  
40  
41  
42  
43  
44  
45  
46  
47  
48  
49  
50  
51  
52  
53  
54  
55  
56  
57  
58  
59  
60

## STROBE Statement—checklist of items that should be included in reports of observational studies

|                              | Item No            | Recommendation                                                                                                                                                                                                                                                                                                                                                                                                                                                                                                                                                                                                                                                                                   |
|------------------------------|--------------------|--------------------------------------------------------------------------------------------------------------------------------------------------------------------------------------------------------------------------------------------------------------------------------------------------------------------------------------------------------------------------------------------------------------------------------------------------------------------------------------------------------------------------------------------------------------------------------------------------------------------------------------------------------------------------------------------------|
| <b>Title and abstract</b>    | 1✓<br>✓            | (a) Indicate the study's design with a commonly used term in the title or the abstract<br>(b) Provide in the abstract an informative and balanced summary of what was done and what was found                                                                                                                                                                                                                                                                                                                                                                                                                                                                                                    |
| <b>Introduction</b>          |                    |                                                                                                                                                                                                                                                                                                                                                                                                                                                                                                                                                                                                                                                                                                  |
| Background/rationale         | 2✓                 | Explain the scientific background and rationale for the investigation being reported                                                                                                                                                                                                                                                                                                                                                                                                                                                                                                                                                                                                             |
| Objectives                   | 3✓                 | State specific objectives, including any prespecified hypotheses                                                                                                                                                                                                                                                                                                                                                                                                                                                                                                                                                                                                                                 |
| <b>Methods</b>               |                    |                                                                                                                                                                                                                                                                                                                                                                                                                                                                                                                                                                                                                                                                                                  |
| Study design                 | 4✓                 | Present key elements of study design early in the paper                                                                                                                                                                                                                                                                                                                                                                                                                                                                                                                                                                                                                                          |
| Setting                      | 5✓                 | Describe the setting, locations, and relevant dates, including periods of recruitment, exposure, follow-up, and data collection                                                                                                                                                                                                                                                                                                                                                                                                                                                                                                                                                                  |
| Participants                 | 6✓                 | (a) <i>Cohort study</i> —Give the eligibility criteria, and the sources and methods of selection of participants. Describe methods of follow-up<br><i>Case-control study</i> —Give the eligibility criteria, and the sources and methods of case ascertainment and control selection. Give the rationale for the choice of cases and controls<br><i>Cross-sectional study</i> —Give the eligibility criteria, and the sources and methods of selection of participants<br>(b) <i>Cohort study</i> —For matched studies, give matching criteria and number of exposed and unexposed<br><i>Case-control study</i> —For matched studies, give matching criteria and the number of controls per case |
| Variables                    | 7✓                 | Clearly define all outcomes, exposures, predictors, potential confounders, and effect modifiers. Give diagnostic criteria, if applicable                                                                                                                                                                                                                                                                                                                                                                                                                                                                                                                                                         |
| Data sources/<br>measurement | 8*✓                | For each variable of interest, give sources of data and details of methods of assessment (measurement). Describe comparability of assessment methods if there is more than one group                                                                                                                                                                                                                                                                                                                                                                                                                                                                                                             |
| Bias                         | 9✓                 | Describe any efforts to address potential sources of bias                                                                                                                                                                                                                                                                                                                                                                                                                                                                                                                                                                                                                                        |
| Study size                   | 10✓                | Explain how the study size was arrived at                                                                                                                                                                                                                                                                                                                                                                                                                                                                                                                                                                                                                                                        |
| Quantitative variables       | 11✓                | Explain how quantitative variables were handled in the analyses. If applicable, describe which groupings were chosen and why                                                                                                                                                                                                                                                                                                                                                                                                                                                                                                                                                                     |
| Statistical methods          | 12✓<br>✓<br>✓<br>✓ | (a) Describe all statistical methods, including those used to control for confounding<br>(b) Describe any methods used to examine subgroups and interactions<br>(c) Explain how missing data were addressed<br>(d) <i>Cohort study</i> —If applicable, explain how loss to follow-up was addressed<br><i>Case-control study</i> —If applicable, explain how matching of cases and controls was addressed<br><i>Cross-sectional study</i> —If applicable, describe analytical methods taking account of sampling strategy<br>(e) Describe any sensitivity analyses                                                                                                                                |

Continued on next page

**Results**

|                  |      |                                                                                                                                                                                                                                                                                                                                                                                                               |
|------------------|------|---------------------------------------------------------------------------------------------------------------------------------------------------------------------------------------------------------------------------------------------------------------------------------------------------------------------------------------------------------------------------------------------------------------|
| Participants     | 13*✓ | (a) Report numbers of individuals at each stage of study—eg numbers potentially eligible, examined for eligibility, confirmed eligible, included in the study, completing follow-up, and analysed<br>(b) Give reasons for non-participation at each stage<br>(c) Consider use of a flow diagram                                                                                                               |
| Descriptive data | 14*✓ | (a) Give characteristics of study participants (eg demographic, clinical, social) and information on exposures and potential confounders<br>(b) Indicate number of participants with missing data for each variable of interest<br>(c) <i>Cohort study</i> —Summarise follow-up time (eg, average and total amount)                                                                                           |
| Outcome data     | 15*✓ | <i>Cohort study</i> —Report numbers of outcome events or summary measures over time<br><i>Case-control study</i> —Report numbers in each exposure category, or summary measures of exposure<br><i>Cross-sectional study</i> —Report numbers of outcome events or summary measures                                                                                                                             |
| Main results     | 16✓  | (a) Give unadjusted estimates and, if applicable, confounder-adjusted estimates and their precision (eg, 95% confidence interval). Make clear which confounders were adjusted for and why they were included<br>(b) Report category boundaries when continuous variables were categorized<br>(c) If relevant, consider translating estimates of relative risk into absolute risk for a meaningful time period |
| Other analyses   | 17✓  | Report other analyses done—eg analyses of subgroups and interactions, and sensitivity analyses                                                                                                                                                                                                                                                                                                                |

**Discussion**

|                  |     |                                                                                                                                                                            |
|------------------|-----|----------------------------------------------------------------------------------------------------------------------------------------------------------------------------|
| Key results      | 18✓ | Summarise key results with reference to study objectives                                                                                                                   |
| Limitations      | 19✓ | Discuss limitations of the study, taking into account sources of potential bias or imprecision. Discuss both direction and magnitude of any potential bias                 |
| Interpretation   | 20✓ | Give a cautious overall interpretation of results considering objectives, limitations, multiplicity of analyses, results from similar studies, and other relevant evidence |
| Generalisability | 21✓ | Discuss the generalisability (external validity) of the study results                                                                                                      |

**Other information**

|         |     |                                                                                                                                                               |
|---------|-----|---------------------------------------------------------------------------------------------------------------------------------------------------------------|
| Funding | 22✓ | Give the source of funding and the role of the funders for the present study and, if applicable, for the original study on which the present article is based |
|---------|-----|---------------------------------------------------------------------------------------------------------------------------------------------------------------|

\*Give information separately for cases and controls in case-control studies and, if applicable, for exposed and unexposed groups in cohort and cross-sectional studies.

**Note:** An Explanation and Elaboration article discusses each checklist item and gives methodological background and published examples of transparent reporting. The STROBE checklist is best used in conjunction with this article (freely available on the Web sites of PLoS Medicine at <http://www.plosmedicine.org/>, Annals of Internal Medicine at <http://www.annals.org/>, and Epidemiology at <http://www.epidem.com/>). Information on the STROBE Initiative is available at [www.strobe-statement.org](http://www.strobe-statement.org).

1  
2  
3 Dear Dr. Quince  
4

5 MED-2012-0224

6 Depression among undergraduate medical students at one UK medical school.  
7

8 Thank you for submitting your paper to Medical Education. I read it with great interest but I am afraid I  
9 am not able to offer publication.  
10

11 With such a substantial literature already outlining the prevalence of depression and other clinical issues  
12 amongst medical students as well as examining which variables relate to prevalence rates it is difficult to  
13 discern what substantive advance is offered by the findings included in this report.  
14

15  
16 As you will appreciate we receive many more papers than we can accept and have to make some careful  
17 decisions about what to publish. This means making some difficult decisions based on originality,  
18 importance and academic rigour. I am sorry we cannot find space for your paper.  
19

20 Thank you for giving us the opportunity to consider your work. Despite this disappointing outcome, I  
21 wish you every success with your continued research and educational activities.  
22

23  
24 Yours sincerely,

25  
26 Dr Kevin Eva  
27 Editor in Chief  
28 Medical Education  
29  
30  
31  
32  
33  
34  
35  
36  
37  
38  
39  
40  
41  
42  
43  
44  
45  
46  
47  
48  
49  
50  
51  
52  
53  
54  
55  
56  
57  
58  
59  
60

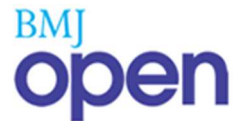

**Prevalence and persistence of depression among  
undergraduate medical students: a longitudinal study in one  
UK medical school.**

|                                 |                                                                                                                                                                                                                                                                                                               |
|---------------------------------|---------------------------------------------------------------------------------------------------------------------------------------------------------------------------------------------------------------------------------------------------------------------------------------------------------------|
| Journal:                        | <i>BMJ Open</i>                                                                                                                                                                                                                                                                                               |
| Manuscript ID:                  | bmjopen-2012-001519.R1                                                                                                                                                                                                                                                                                        |
| Article Type:                   | Research                                                                                                                                                                                                                                                                                                      |
| Date Submitted by the Author:   | 01-Jul-2012                                                                                                                                                                                                                                                                                                   |
| Complete List of Authors:       | Quince, Thelma; University of Cambridge, Medical School<br>Wood, Diana; University of Cambridge, School of Clinical Medicine<br>Parker, Richard; University of Cambridge, Department of Public Health and Primary Care<br>Benson, John; University of Cambridge, Department of Public Health and Primary Care |
| <b>Primary Subject Heading</b>: | Medical education and training                                                                                                                                                                                                                                                                                |
| Secondary Subject Heading:      | Mental health                                                                                                                                                                                                                                                                                                 |
| Keywords:                       | Undergraduate medical students, Depression, Longitudinal study, Medical education                                                                                                                                                                                                                             |
|                                 |                                                                                                                                                                                                                                                                                                               |

SCHOLARONE™  
Manuscripts

1  
2  
3 TITLE PAGE

4 Prevalence and persistence of depression among undergraduate medical students: a  
5 longitudinal study at one UK medical school.  
6  
7

8  
9  
10 CORRESPONDING AUTHOR

11 Dr Thelma A Quince.  
12 Primary Care Unit  
13 Department of Public Health and Primary Care  
14 University of Cambridge  
15 Institute of Public Health  
16 Forvie Site  
17 Cambridge CB2 0SR  
18 Email: [taq1000@medschl.cam.ac.uk](mailto:taq1000@medschl.cam.ac.uk)  
19 Tel: 01223 768266  
20 Fax: 01223 762515  
21  
22

23 Dr Diana F Wood  
24 School of Clinical Medicine  
25 University of Cambridge  
26 Cambridge  
27

28  
29 Mr Richard A Parker  
30 Primary Care Unit  
31 Department of Public Health and Primary Care  
32 University of Cambridge  
33 Cambridge  
34

35 Dr John Benson  
36 Primary Care Unit  
37 Department of Public Health and Primary Care  
38 University of Cambridge  
39  
40

41  
42 KEY WORDS

43  
44 Undergraduate medical students, Depression, Longitudinal study, Medical education  
45

46 **WORD COUNT: 3348**  
47  
48  
49  
50  
51  
52  
53  
54  
55  
56  
57  
58  
59  
60

## ARTICLE SUMMARY

### Article focus:

- What is the prevalence of depression amongst male and female medical students?
- Does prevalence of depression increase or decrease during the course?
- For those affected, is depression persistent?

### Key messages:

- Although prevalence of depression amongst medical students was not higher than that found comparable groups a significant minority of students displayed depression but the majority of these did so only on one occasion.
- Prevalence was not found increase over time.
- Although the majority of students who demonstrated depression did so on only one occasion mechanisms are needed to identify and support depressed students

### Strengths and limitations of this study:

#### Strengths

- Data obtained from students in all six years of medical undergraduate training.
- Use of validated survey instrument allowing comparisons with comparable groups.
- Results of missing value analysis together with response rates indicate generalisability of study results to institution in which study conducted.

#### Limitations

- Study undertaken in one UK medical school undertaking a traditional medical course limit generalisability.
- Course structure results only half of students in the Core Science component being able to transfer to Clinical component so limiting longitudinal nature of study.
- Attrition of response rate.
- Use of single simple self-report instrument.



## ABSTRACT

Objectives: To determine amongst male and female medical students the prevalence of depression, ~~whether prevalence~~ changes over time ~~and, and for students affected by depression,~~ whether depression ~~it~~ persists for affected students.

Design: Longitudinal study comprising annual questionnaire surveys which included the depression subscale (HADS-D) of the Hospital Anxiety and Depression Scale.

Participants: ~~Between 2007 and 2010 all~~ Between 2007 and 2010, 1112 students entering the Core Science component (Year 1) and all 542 students entering the Clinical component (Year 4) of the Cambridge (UK) medical course were followed-up annually. ~~(the first years of Core Science and Clinical components respectively).~~

Methods: We analysed, separately for men and women, mean HADS-D scores, ~~the~~ proportions whose scores indicated depression at different time-points and for students maintaining participation, ~~the~~ number of occasions on which their HADS-D scores indicated depression.

Results: ~~Data provided by~~ 725 Core Science and 364 Clinical students participated. ~~indicated no significant gender differences in median HADS-D scores. The range of~~ Mean HADS-D scores amongst Core Science students was ranged between 3.34 -3.49 amongst all Core Science students and ~~and~~ between 2.16-2.91 amongst all Clinical students. There was no difference between men and women in median HADS-D scores. Prevalence of depression ranged between 5.7% - 10.6% amongst all Core Science students and between 2.7% - 8.2% amongst all Clinical students.

Over time Core Science students displayed no increase in mean HADS-D score.

Amongst Clinical students only men displayed a small increase ~~A small increase was found amongst male Clinical students~~ [time coefficient 0.33 (95% CI 0.11- 0.55)].

1  
2  
3 Prevalence did not increase over time, but not amongst women. No increase in mean  
4 HADS-D scores was observed amongst Core Science students.  
5  
6  
7 Prevalence of depression varied from 2.2% to 14.8%. Prevalence was not found to  
8 increase over time.

9  
10  
11  
12 220 Core Science and 150 Clinical students maintained participation  
13 participated  
14 throughout the study. Of these 18.2% and 10.6% respectively recorded HADS-D  
15 scores indicating depression on at least one occasion. ~~on at least one occasion.~~ Of 56  
16  
17  
18  
19  
20 students recording depression at some point, 37 did so only once.

21 Conclusions:

22  
23 Prevalence of depression amongst participants was similar to that reported for  
24 comparable groups. Amongst the medical students studied prevalence of depression was  
25 not higher than that found for comparable groups. However in some years a significant  
26 minority displayed depression and a  
27 Amongst men approaching the end of clinical  
28 studies depression scores increased. In all years a minority of students displayed  
29 depression; for some this persisted. Gender differences in respect of depression scores  
30 and prevalence were minimal. Mechanisms are needed to identify and support students  
31  
32  
33  
34  
35  
36  
37  
38  
39  
40  
41  
42  
43  
44  
45  
46  
47  
48  
49  
50  
51  
52  
53  
54  
55  
56  
57  
58  
59  
60 suffering from depression, particularly those with persistent low mood when persistent.

## MAIN TEXT

### INTRODUCTION

Psychological wellbeing is important for medical students, for the patients they meet and for their future medical practice.[1- 4] Medical students with depression more commonly consider dropping out of their course.[5] Among newly qualified physicians associations have been found between depressive symptoms and increasing cynicism, self-perceived medical errors and lower levels of self-rated health.[6-8] As their careers progress, physicians have elevated rates of suicide compared to the general population.[9-12] Patient care is affected by psychological distress amongst physicians: poor communication, diminished quality of care and medical errors have been found to be associated with physician stress.[13,14]

Physicians are more likely to experience depression compared to the general population. [9-12] However, the prevalence of depression among medical students varies, depending on age, stage of training, methods of measurement and location.[15] The use of different study instruments limits the extent to which medical students can be compared directly with similarly aged populations. Even where valid comparisons have been made evidence remains conflicting.[16-20]

Gender differences in depression have been found in both practicing and newly qualified physicians, which mirror epidemiological studies indicating that depression is more common amongst women than men.[21] A study of US residents found that 45% of women compared to 32% of men reported 4 or 5 depressive symptoms.[6] Most, but not all studies conducted amongst medical students, using various instruments, show a similar pattern.[15,20,22,23]

The prevailing view is that depression rises during undergraduate medical education and that this rise is more pronounced among women.[15,20,24] However, this pattern is not

1  
2  
3 universally reported: studies amongst some medical student populations, show levels of  
4  
5 depression fall between years 1 and 2 and between preclinical and clinical stages of  
6  
7 training.[22,23] Longitudinal studies in the UK and Sweden suggest that some students  
8  
9 repeatedly experience psychological distress during medical training,[25,26] but few  
10  
11 studies have examined whether depression for an individual student is persistent.

12  
13 The School of Clinical Medicine at the University of Cambridge is engaged in a study  
14  
15 of factors in undergraduate education which may influence the quality of patient care  
16  
17 provided by students in their subsequent medical practice. We regard student depression  
18  
19 as one such factor. In October 2007, we began a longitudinal study involving all  
20  
21 students coming to Cambridge to study medicine. This paper reports the findings in  
22  
23 respect of three questions concerning male and female medical students:  
24  
25

- 26  
27 1] What is the prevalence of depression?  
28  
29 2] Does prevalence of depression increase or decrease during the course?  
30  
31 3] For those affected, is depression persistent?  
32  
33

## 34 35 36 **METHODS**

### 37 38 **Participants**

39  
40 The medical course at Cambridge comprises a Core Science component (Years 1-3)  
41  
42 during which students learn core medical science with a small element of clinical  
43  
44 experience leading to a primary BA degree, and a Clinical component (Years 4-6).

45  
46 Around 280 students, typically aged 18 – 19 years, enter Year 1. At the end of Year 3,  
47  
48 approximately half continue into the Clinical component in Cambridge. All 1112

49  
50 students entering the Core Science component (Year 1) and all 542 students entering the  
51  
52 Clinical component (Year 4) between 2007 and 2010 were followed-up annually.

53  
54  
55  
56 Students were invited to participate in a longitudinal study comprising annual  
57  
58  
59  
60

1  
2 questionnaire surveys. Students entering the Clinical component in 2010 comprised  
3  
4 those students who had entered the Core Science component in 2007 and who remained  
5  
6 in Cambridge.  
7

### 8 9 **Outcome Measure**

10  
11 We measured depression using the depression subscale (HADS-D) of the Hospital  
12  
13 Anxiety and Depression Scale.[27] HADS is a self-report instrument initially developed  
14  
15 to evaluate the presence and severity of anxiety and depression in general medical  
16  
17 populations. It is regarded as a useful tool for identifying those with emotional distress  
18  
19 and has good psychometric properties.[28,29] HADS-D has been widely used in the UK  
20  
21 among members of the general population,[30] among young adults within the general  
22  
23 population,[31] with undergraduates,[32,33] medical students,[16,34,35] and medical  
24  
25 practitioners.[36,37]  
26  
27

28  
29 HADS-D comprises seven items expressed both positively and negatively, giving a  
30  
31 maximum score of 21. It has widely recognised norms relating to depression: scores of  
32  
33 0-7 are regarded as “normal”, scores of 8-10 indicate “possible” depression and scores  
34  
35 of 11 and over indicate “probable” depression. The HADS-D norm of greater than or  
36  
37 equal to 8 has been shown to have a sensitivity of 0.82 (95% CI 0.73-0.89) and a  
38  
39 specificity of 0.74 (95% CI 0.60-0.84).[29] A study of UK undergraduates comparing  
40  
41 results for HADS-D with interview data concluded that the HADS-D scale was a  
42  
43 reasonably accurate indicator of depressive conditions in university students at the  
44  
45 recommended cut-offs.[38]  
46  
47  
48

### 49 **Procedures**

50  
51 Students in years 1-5 received questionnaires during the first week of each new  
52  
53 academic year (September / October). Students in Year 6 received questionnaires in  
54  
55 January of their final year, prior to final examinations in June. We used a paper-based  
56  
57 questionnaire for all students in 2007 and 2008 and for Clinical students in 2009. We  
58  
59  
60

1  
2  
3 used an online questionnaire for Core Science students in 2009 and for all students in  
4  
5 2010 (table 1). Participation was voluntary. Questionnaires were labelled by study  
6  
7 number only. A study data manager (who had no access to results) sent one reminder to  
8  
9 students after 2 weeks. A small prize was awarded annually by lottery to a small number  
10  
11 of participants. The study received approval from the University of Cambridge  
12  
13 Psychology Ethics Committee.

## 14 15 **Analysis**

### 16 17 **Overall Approach**

18  
19 We took a HADS-D of greater than or equal to 8 to indicate depression. We set  
20  
21 statistical significance at the 5% level ( $p < 0.05$ ) for all analyses. Only about half of the  
22  
23 Core Science students present in Years 1-3 remained in Cambridge for Years 4-6,  
24  
25 yielding small numbers for analysis across all six years (Figure 1). For this reason, we  
26  
27 analysed data separately for students from the Core Science and Clinical components.  
28  
29 For study questions 1 and 2 (prevalence of depression) we included all students  
30  
31 completing questionnaires between 2007 and 2011. For study question 3 (persistence of  
32  
33 depression) we included students entering either the Core Science or the Clinical  
34  
35 component in 2007, 2008 and 2009, who maintained their participation for all years of  
36  
37 their respective course.  
38  
39  
40  
41

### 42 43 **Response bias**

44  
45 For study questions 1 and 2, (prevalence of depression) we undertook missing value  
46  
47 analyses for men and women separately, using logistic regression to determine whether  
48  
49 HADS-D on entry predicted subsequent study participation. Outcome variables were  
50  
51 missing values (yes or no) for HADS-D at Years 2 and 3 for students entering year 1  
52  
53 and Years 5 and 6 for students entering year 4. The explanatory variable was HADS-D  
54  
55 at Year 1 for Core Science students and Year 4 for Clinical students. We included 'year  
56  
57 of course entry' as an explanatory factor, to adjust for student cohort. Students entering  
58  
59  
60

1  
2  
3 in 2010 were considered to have missing subsequent participation if they did not  
4  
5 respond in Year 2 / Year 5. We calculated odds ratios corresponding to the increased  
6  
7 risk of non-response for every 1 unit increase in HADS-D at course entry, with 95%  
8  
9 confidence intervals for odds ratios and p-values.  
10

11 For study question 3 (persistence of depression) within each component we undertook  
12  
13 separate t tests to examine whether there was any difference in the mean scores of those  
14  
15 who maintained their participation and those who did not.  
16

#### 17 Detailed Analyses

18  
19 For study question 1 (prevalence of depression) we measured separately for men and  
20  
21 women, at each point in the course, mean HADS-D and the proportion with HADS-D  
22  
23 scores  $\geq 8$  indicating depression. We compared median HADS-D amongst men and  
24  
25 women using non-parametric tests (Mann Whitney U tests) and the proportions of men  
26  
27 and women whose HADS-D indicated depression (Chi-squared tests).  
28  
29

30  
31 For study question 2 (prevalence of depression over time) we undertook regression  
32  
33 analyses separately for men and women, using a 'Generalised Estimating Equations'  
34  
35 (GEE) method. We chose the GEE method because many students had repeated data,  
36  
37 the HADS-D scores were skewed, and we did not want to make any full distributional  
38  
39 assumptions. The model assumed a general (unstructured) correlation structure. In order  
40  
41 to adjust for effect of student year of entry, we included this as an explanatory factor  
42  
43 variable. To test the robustness of our model we applied a sensitivity analysis to the  
44  
45 outcome variables, removing outliers more than 3 standard deviations away from the  
46  
47 mean.  
48  
49

50  
51 For study question 3 (persistence of depression) we examined separately for men and  
52  
53 women the number of occasions on which individual students' HADS-D score indicated  
54  
55 depression. Within each component we examined whether the proportions of men and  
56  
57 women whose score indicated depression differed (i) on any occasion, (ii) on only one  
58  
59  
60

occasion, or (iii) on more than one occasion. Given the small sample size we used Newcombe's method (39) with R software (40) to calculate differences in independent (i.e. unpaired) proportions together with 95% confidence intervals.

## RESULTS

### Participants

In total 725 Core Science and 364 Clinical students participated in the study. Table 1 shows the number of entrants to the Core Science and Clinical components for each year of entry (2007-2010) and those participating each year and providing depression data.

Table 1: Number of participating students providing depression scores at each year for each component of the course.

| <b>Core Science Component</b>                                                    |                             |                                |                                |                                |
|----------------------------------------------------------------------------------|-----------------------------|--------------------------------|--------------------------------|--------------------------------|
| Participating students in Each Year of Course (% of year group)<br>(% of female) |                             |                                |                                |                                |
|                                                                                  | Total number<br>of entrants | Year of component              |                                |                                |
|                                                                                  |                             | Year 1                         | Year 2                         | Year 3                         |
| Students entering 2007                                                           | 266<br>(52.2%)              | 182 (68.4%)<br>(51.1%)         | 142 (53.4%)<br>(52.8%)         | 121 (45.5%)<br>(53.7%)         |
| Students entering 2008                                                           | 283<br>(45.8%)              | 139 (49.1%)<br>(58.3%)         | 87 (30.7%)<br>(60.9%)          | 78 (27.6%)<br>(60.2%)          |
| Students entering 2009                                                           | 281<br>(48.9%)              | 156 (55.5%)<br>(53.2%)         | 94 (33.4%)<br>(53.2%)          | 84 (29.9%)<br>(57.1%)          |
| Students entering 2010                                                           | 282<br>(46.3%)              | 188 (67.0%)<br>(50.5%)         | 107 (37.9%)<br>(50.5%)         |                                |
| <b>Total</b>                                                                     | <b>1112<br/>(48.0%)</b>     | <b>665 (59.8%)<br/>(52.9%)</b> | <b>430 (38.7%)<br/>(53.9%)</b> | <b>283 (25.4%)<br/>(56.5%)</b> |
| <b>Clinical Component</b>                                                        |                             |                                |                                |                                |
| Participating students in Each Year of Course (% of year group)<br>(% of female) |                             |                                |                                |                                |
|                                                                                  | Total number<br>of entrants | Year of component              |                                |                                |
|                                                                                  |                             | Year 4                         | Year 5                         | Year 6                         |
| Students entering 2007                                                           | 135<br>(61.1%)              | 102 (75.6%)<br>(62.7%)         | 82(60.7%)<br>(67.1%)           | 76(56.3%)<br>(67.1%)           |
| Students entering 2008                                                           | 135<br>(44.3%)              | 97(71.9%)<br>(54.6%)           | 70(51.9%)<br>(58.6%)           | 57(42.2%)<br>(63.2%)           |
| Students entering 2009                                                           | 135<br>(49.6%)              | 70(51.9%)<br>(46.4%)           | 47(34.8%)<br>(45.7%)           | 49 (36.3%)<br>(45.8%)          |
| Students entering 2010                                                           | 137<br>(53.3%)              | 68(49.6%)<br>(50.0%)           | 63(46.0%)<br>(55.6%)           |                                |
| <b>Total</b>                                                                     | <b>542<br/>(52.0%)</b>      | <b>337 (62.2%)<br/>(54.3%)</b> | <b>262 (48.3%)<br/>(58.0%)</b> | <b>182 (33.6%)<br/>(59.9%)</b> |



## Response Bias

Table 2: Missing value analysis: Logistic regression results presented as odds ratios, 95% confidence intervals and p-values for relationship between HADS-D on entry and subsequent study participation, adjusting for student cohort

| Depression (HADS-D)             | Men                 | Women               |
|---------------------------------|---------------------|---------------------|
| Core Science component students |                     |                     |
| odds ratio (95% CI)             | 1.05 (0.95 to 1.16) | 1.08 (0.99 to 1.18) |
| p values                        | p=0.35              | p=0.08              |
| Clinical component students     |                     |                     |
| odds ratio(95% CI)              | 1.07 (0.91 to 1.25) | 0.95 (0.79 to 1.15) |
| p values                        | p=0.43              | p=0.62              |

Table 2 shows the results of the missing value analysis for study questions 1 and 2. For students in both components of the course, there was no significant relationship between HADS-D on entry and subsequent study participation. For study question 3, no statistically significant difference in mean HADS-D was found between students who maintained their participation and those who did not (analyses not shown).

### Prevalence of Depression amongst men and women (Study question 1)

Table 3 shows, at each point in the course, mean HADS-D and the proportion of students whose HADS-D indicated depression.

#### Core Science component

Mean HADS-D ranged between 3.34 and 3.49. The proportion of students whose HADS-D scores indicated depression ranged between 5.7% (5.8% among men and 5.7% among women) and 10.6% (14.8% among men and 7.5% among women).

#### Clinical component

Mean HADS-D ranged between 2.16 and 2.91. The proportion of students whose HADS-D scores indicated depression ranged between 2.7% (3.2% among men and 2.2% among women) and 8.2% (5.6% among men and 10.0% among women).

Table 3 shows comparisons, at each point in the medical course, between median HADS-D amongst men and women (Mann Whitney U tests). There were no significant gender differences in either course component.

Table 3: Mean HADS-D (Standard deviation) and percentages of participants whose HADS-D indicated depression by gender for each year of course within each component. Non-parametric gender comparison of means and Chi-squared gender comparisons of percentages.

| Year                                   | Mean scores            |                        |                          | Mann Whitney U       |
|----------------------------------------|------------------------|------------------------|--------------------------|----------------------|
|                                        | All Mean (SD)          | Men Mean (SD)          | Women Mean (SD)          |                      |
| <b>Core science component students</b> |                        |                        |                          |                      |
| Yr 1<br>(n=665/313/352)                | 3.34 (2.36)            | 3.22 (2.24)            | 3.44 (2.47)              | p=0.339              |
| Yr 2<br>(n=429/197/232)                | 3.49 (2.75)            | 3.29 (2.77)            | 3.66 (2.76)              | p=0.120              |
| Yr 3<br>(n=282/122/160)                | 3.35 (2.85)            | 3.77 (3.16)            | 3.04 (2.56)              | p=0.062              |
| <b>Clinical component students</b>     |                        |                        |                          |                      |
| Yr 4<br>(n=337/157/180)                | 2.16 (2.08)            | 2.23 (2.06)            | 2.10 (2.11)              | p=0.474              |
| Yr 5<br>(n=260/109/151)                | 2.65 (2.51)            | 2.82 (2.66)            | 2.52 (2.40)              | p=0.398              |
| Yr 6<br>(n=182/72/110)                 | 2.91(2.92)             | 3.08 (2.88)            | 2.79 (2.96)              | p=0.311              |
| Year                                   | Prevalence             |                        |                          | X <sup>2</sup>       |
|                                        | All % Depression (≥ 8) | Men % Depression (≥ 8) | Women % Depression (≥ 8) |                      |
| <b>Core science component students</b> |                        |                        |                          |                      |
| Yr 1<br>(n=665/313/352)                | 5.7%                   | 5.8%                   | 5.7%                     | <sup>a</sup> p=0.969 |
| Yr 2<br>(n=429/197/232)                | 8.4%                   | 7.1%                   | 9.5%                     | <sup>a</sup> p=0.376 |
| Yr 3<br>(n=282/122/160)                | 10.6%                  | 14.8%                  | 7.5%                     | <sup>a</sup> p=0.050 |
| <b>Clinical component students</b>     |                        |                        |                          |                      |
| Yr 4<br>(n=337/157/180)                | 2.7%                   | 3.2%                   | 2.2%                     | <sup>a</sup> p=0.585 |
| Yr 5<br>(n=260/109/151)                | 5.8%                   | 6.4%                   | 5.3%                     | <sup>a</sup> p=0.701 |
| Yr 6<br>(n=182/72/110)                 | 8.2%                   | 5.6%                   | 10.0%                    | <sup>a</sup> p=0.286 |

<sup>a</sup> Comparison of men and women in respect of normal HADS-D (score ≤ 7) and HADS-D indicating depression (score ≥ 8)

Table 3 also shows the proportions of men and women whose HADS-D indicated depression (Chi-squared tests). Amongst Core Science component students, significantly more men than women in year 3 recorded HADS-D scores indicating depression, but there were no differences in other years. There were no significant differences between men and women in the Clinical component.

### Prevalence of depression amongst men and women over time (Study Question 2)

Table 4 shows the results of the GEE models used in this analysis. These are supported by the finding reported above that missing values were not significantly dependent on initial depression levels (table 2). The time coefficient resulting from a GEE model should be interpreted as representing a population-averaged effect rather than an individual student-level effect.

Table 4: Linear time coefficients resulting from GEE regression analyses on the outcome variable HADS-D, adjusting for student year of entry, presented with 95% confidence intervals.

|                                                                                         | Men                     | Women                    |
|-----------------------------------------------------------------------------------------|-------------------------|--------------------------|
| Core science component students<br>Depression (HADS-D)<br>Time coefficients<br>(95% CI) | 0.20<br>(-0.03 to 0.43) | -0.11<br>(-0.31 to 0.08) |
| Clinical component students<br>Depression (HADS-D)<br>Time coefficients<br>(95% CI)     | 0.33<br>(0.11 to 0.55)  | 0.17<br>(-0.04 to 0.39)  |

All results were similar after removal of outliers more than 3 SD from the mean.

#### Core Science component

The results indicate no significant difference, amongst either men or women, in HADS-D scores over time. Sensitivity analysis (removal of outliers) produced similar results.

#### Clinical component

A very small but statistically significant increase in HADS-D over time was found amongst men. No significant difference over time was found amongst women.

Sensitivity analysis (removal of outliers) produced similar results.

### Persistence of Depression amongst men and women (Study Question 3)

Table 5 shows the prevalence of depression recorded by students who maintained their participation throughout the three years of each course component.

Table 5: Prevalence of depression recorded by repeat participants.

|                                        | All                          | Men                         | Women                        | Differences in proportion women-men (95% CI) |
|----------------------------------------|------------------------------|-----------------------------|------------------------------|----------------------------------------------|
| <b>Core science component students</b> | n=220<br>(% of participants) | n=96<br>(% of participants) | n=124<br>(% of participants) |                                              |
| On any occasion                        | 40<br>(18.2%)                | 17<br>(17.7%)               | 23<br>(18.5%)                | 0.008<br>(-0.10 to 0.11)                     |
| On only one occasion                   | 29<br>(13.2%)                | 9<br>(9.4%)                 | 20<br>(16.1%)                | 0.07<br>(-0.03 to 0.15)                      |
| On more than one occasion              | 11<br>(5.0%)                 | 8<br>(8.3%)                 | 3<br>(2.4%)                  | -0.06<br>(-0.13 to 0.001)                    |
| <b>Clinical component students</b>     | n=150<br>(% of participants) | n=59<br>(% of participants) | n=91<br>(% of participants)  |                                              |
| On any occasion                        | 16<br>(10.6%)                | 5<br>(8.5%)                 | 11<br>(12.1%)                | 0.04<br>(-0.08 to 0.13)                      |
| On only one occasion                   | 8<br>(5.3%)                  | 3<br>(5.1%)                 | 5<br>(5.5%)                  | 0.004<br>(-0.09 to 0.08)                     |
| On more than one occasion              | 8<br>(5.3%)                  | 2<br>(3.4%)                 | 6<br>(6.6%)                  | 0.03<br>(-0.06 to 0.11)                      |

#### Core Science component

Amongst the 96 men and 124 women who maintained their participation, 40 students (17 men and 23 women) recorded at least one HADS-D score indicating depression. Of these, 29 (9 men and 20 women) did so on only one occasion; 9 (6 men and 3 women) did so on two occasions. Two men recorded scores indicating “possible” depression throughout the Core Science course component.

#### Clinical component

Amongst the 59 men and 91 women who maintained their participation, 16 students (5 men and 11 women) recorded at least one HADS-D score indicating depression. Of these, 8 (3 men and 5 women) did so on one occasion; 6 (all women) did so on two

1  
2 occasions. Two men recorded scores indicating “possible” depression throughout the  
3  
4 Clinical course component.  
5

6  
7 Table 5 also shows the results of comparisons between men and women in respect of  
8  
9 transitory or persistent depression. There were no significant gender differences in  
10  
11 either course component.  
12

## 13 **DISCUSSION**

14  
15 Amongst groups of male and female medical students in Cambridge, the prevalence of  
16  
17 depression varied from 2.2% to 14.8%. No significant changes in mean depression  
18  
19 scores were observed amongst Core Science component students or amongst women in  
20  
21 the Clinical component. A statistically significant increase in mean depression scores  
22  
23 was found for men during the Clinical component. However, this increase was  
24  
25 extremely small when considered against the 21 points of the HADS-D scale. Most  
26  
27 students who demonstrated depression during the Core Science component did so on  
28  
29 only one occasion. In the Clinical component, although few students experienced  
30  
31 depression, half did so on more than one occasion. We found no evidence that women  
32  
33 were more likely than men to experience depression, either on one occasion or  
34  
35 persistently.  
36  
37

38  
39 Our study obtained data on depression from students in all 6 years of medical training.  
40  
41 In the Core Science component, for each year of the course between 25.4% and 59.8%  
42  
43 of those eligible participated. Comparable figures for the Clinical component were  
44  
45 33.6% to 62.2%. Almost 27% of Core Science students and 37% of Clinical students  
46  
47 entering between 2007 and 2009 participated on all occasions during their respective  
48  
49 course components, allowing longitudinal observations to be made. These participation  
50  
51 rates, allied with missing data analyses indicating that initial scores did not predict later  
52  
53 non-response, support the generalisability of our results to the population of medical  
54  
55  
56  
57  
58  
59  
60

1  
2  
3 students at the University of Cambridge. Where possible these results are related to  
4  
5 existing literature using HADS-D in order to allow direct comparison.  
6

7 Mean HADS-D scores recorded by students in our study ranged from 2.16 (SD 2.08) for  
8  
9 Clinical students in year 4 of the course, to 3.49 (SD 2.75) for Core Science students in  
10  
11 year 2. These are roughly similar to mean scores reported for comparable groups:  
12  
13 scores from 2.68 to 7.5 for medical students elsewhere,[17,19,34] and from 2.33 to 5.2  
14  
15 for non-medical undergraduate populations.[41- 43]  
16

17 Mean scores may not reflect the prevalence of significant depression. Using the HADS-  
18  
19 D score of  $\geq 8$ , we found the prevalence of depression ranged from 2.7% for Clinical  
20  
21 students in year 4 of the course, to 10.6% for Core Science students in year 3.  
22  
23

24 Prevalence of depression using a similar cut-off score amongst comparable groups has  
25  
26 been found to vary from 9.5% to 29% for medical students,[16,17,19] and from 3.8% to  
27  
28 18% for non-medical undergraduates.[38,41] Studies in the general population in  
29  
30 Norway and the UK have reported a prevalence of 8% and 12% respectively,[30,44]  
31  
32 whilst a study of people aged 18-25 reported a prevalence of 12% amongst men and  
33  
34 18% amongst women.[31] Our results suggest that Cambridge medical students do not  
35  
36 have a higher prevalence of depression than students in general or comparable non-  
37  
38 student members of the general population. Other work, investigating the suicide rate  
39  
40 amongst students at the University of Cambridge over the period 1970-1996 also found  
41  
42 that rates were similar to comparable age groups in the general population.[45]  
43  
44

45 Although studies involving similarly aged members of the general population have  
46  
47 reported a higher prevalence of depression amongst women compared to men,[31,44]  
48  
49 we found no significant gender differences in either mean HADS-D or prevalence of  
50  
51 depression in any year of the course. This replicates previous findings using the HADS  
52  
53 with other undergraduates including medical and dental students.[46,47]  
54  
55  
56  
57  
58  
59  
60

1  
2  
3 Turning to the question of whether psychological well-being deteriorates during  
4 university medical education a UK study of non-medical undergraduates found a  
5 significant increase in the proportion recording depression between the period  
6 immediately prior to the start of the course and the middle of the second academic  
7 year.[33] Few studies have examined the persistence of depression within individual  
8 students over time. In our study, regression analyses indicated no significant change for  
9 either men or women throughout the equivalent Core Science component of the course.  
10 Analysis of students in the Clinical component indicated a very small increase in mean  
11 scores for depression for men but not for women. These minor increases in mean  
12 depression scores may be related to the approach of finals examinations, or they may  
13 presage the known increase in depression seen amongst practising doctors.  
14 For many students, the experience of depression was transient. Among repeat  
15 participants, 40 Core Science and 16 Clinical students recorded HADS-D scores  
16 indicating depression at some point. Of these 56 students, 37 did so on only one  
17 occasion. Nevertheless, 19 students (11 Core Science and 8 Clinical) showed evidence  
18 of repeated depression, with four men (2 in each component of the course) doing so in  
19 all three years of their respective course component. We found no significant difference  
20 in transient or persistent raised levels of depression between men and women.  
21 The authors are not aware of any other studies using HADS-D of medical students  
22 against which to set these particular findings. However, their key implication is that  
23 whilst overall persistence of depression is low, there exists a small, important minority  
24 of students for whom depression is an ongoing experience. It is vital for medical schools  
25 to recognise and support all students experiencing depression, but in particular to  
26 consider how best to encourage this especially vulnerable group to seek help, given the  
27 evidence that suggests that they are reluctant to do so.[1,26,48,49]

1  
2  
3 The HADS-D is a well validated and widely used self-report instrument. The  
4  
5 procedures for administering the survey were created to ensure anonymity and  
6  
7 confidentiality.[50] This study is limited by being based on one UK university,  
8  
9 providing a “traditional” course with a collegiate pastoral support structure. There may  
10  
11 have been a systematic difference between those participating and those not  
12  
13 participating (i.e. a non response bias) which may have affected our results. However,  
14  
15 the missing value analysis supports the view that those continuing to participate could  
16  
17 be considered representative of all student entrants in their year group and that  
18  
19 continued participation was not influenced by scores for HADS-D recorded at the  
20  
21 beginning of participation. We cannot exclude the possibility of an association between  
22  
23 an unobserved change in depression and the missing values.  
24  
25

26  
27 We tested for a linear relationship between year of course and depression which rests on  
28  
29 the assumption that depression increases or decreases gradually over time. In reality  
30  
31 this may not have been the case: mean scores could rise during one year and then  
32  
33 decline during the next year. Unfortunately our sample size was too small and number  
34  
35 of time points too few to test for quadratic or other polynomial relationships between  
36  
37 individual course years and depression, but future studies may like to consider this.  
38  
39

40  
41 Future work should investigate the generalisability of these results to other medical  
42  
43 schools in the UK and, in order to extend the relevance of findings to future patient care,  
44  
45 the relationship between depression during undergraduate medical education and  
46  
47 “burnout” after qualification. Further work is needed on identifying both transient and  
48  
49 repeated experiences of depression among medical students and understanding possible  
50  
51 causes related to course design and students’ experience of it. For example, studies of  
52  
53 students have found depressive symptoms to be related to prior mental health  
54  
55 problems,[49] personality aspects such as maladaptive perfectionism,[51]and strong  
56  
57 feelings of altruism and empathy.[52]  
58  
59  
60



## CONCLUSIONS

Overall, only a small proportion of the student body experienced depression. These findings do not support the view that medical students exhibit a higher prevalence of depression than other comparable groups or that differences in mean depression score or prevalence exist between men and women. Nevertheless, depression may start to become more prevalent as medical qualification approaches and a small number of students who experience depression do not recover from one year to the next. It is important that mechanisms should be in place to identify and support all students suffering from depression, but particularly the very few with persistent low mood. As part of this process, it remains important to challenge the stigma of mood disorder amongst health professionals to encourage students experiencing difficulty to seek and receive appropriate help.

## ACKNOWLEDGEMENTS

The authors are indebted to James Brimicombe, Data Manager of the Primary Care Unit, Department of Public Health and Primary Care, University of Cambridge, for his administration of the online survey.

## COMPETING INTERESTS STATEMENT

All authors have completed the Unified Competing Interest form at [www.icmje.org/coi\\_disclosure.pdf](http://www.icmje.org/coi_disclosure.pdf) (available on request from the corresponding author) and declare: no support from any organisation for the submitted work; no financial relationships with any organisations that might have an interest in the submitted work in the previous 3 years; no other relationships or activities that could appear to have influenced the submitted work.

## CONTRIBUTORSHIP STATEMENT

TQ, JB and DW were responsible for the conception and design of the study. TQ coordinated the study and managed the data collection. TQ and RP did the analyses, JB and DW contributed to interpretation of the findings. TQ wrote the first draft of the

1  
2  
3 manuscript. All authors had full access to all data and all were involved in critical  
4 revision of the manuscript.  
5  
6

## 7 8 FUNDING STATEMENT

9 This research received no specific grant or other financial support from any funding  
10 agency in the public, commercial or not-for-profit sectors.  
11  
12

## 13 14 ETHICAL APPROVAL

15  
16 The study was approved by the University of Cambridge Psychology Ethics Committee.  
17  
18  
19  
20  
21  
22  
23  
24  
25  
26  
27  
28  
29  
30  
31  
32  
33  
34  
35  
36  
37  
38  
39  
40  
41  
42  
43  
44  
45  
46  
47  
48  
49  
50  
51  
52  
53  
54  
55  
56  
57  
58  
59  
60

## REFERENCE LIST

- 1 Tyssen R, Vaglum P, Grønvold NT, et al. Factors in medical school that predict postgraduate mental health problems in need of treatment. A nationwide and longitudinal study. *Med Educ* 2001;**35**:110-120.
- 2 Royal College of Psychiatrists. The mental health of students in higher education. Council Report CR112 January 2003, Royal College of Psychiatrists, London:2003.
- 3 Tyssen R, Hem E, Vaglum P, et al. The process of suicidal planning among medical doctors: predictors in a longitudinal Norwegian sample. *J Affect Disord* 2004;**80**:191-198.
- 4 Dunn LB, Iglewicz A, Moutier C, A conceptual model of students' well-being: Promoting resilience and preventing burnout. *Acad Psychiatry* 2008;**32**:44-53.
- 5 Dyrbye LN, Thomas MR, Power DV, et al. Burnout and serious thoughts of dropping out of medical school: A multi-institutional study. *Acad Med* 2010a;**85**:94-102.
- 6 Collier VU, McCue JD, Markus A, et al. Stress in medical residency: Status Quo after a decade or reform? *Ann Intern Med* 2002;**136**:384-390.
- 7 West CP, Tan AD, Habermann TM, et al. Association of resident fatigue and distress with perceived medical errors. *JAMA* 2009;**302**:1294-1300.
- 8 Yi MS, Mrus JM, Mueller CV, et al. Self rated health of primary care house officers and its relationship to psychological and spiritual well-being. *BMC Med Educ* 2007;**7**:9.
- 9 Lindeman S, Laara E, Hakko H, et al. A systematic review on gender-specific suicide mortality in medical doctors. *Br J Psychiatry* 1996;**168**:274-93.
- 10 Schernhammer ES, and Colditz GA, Suicide rates among physicians: A quantitative and gender assessment (Meta-analysis). *Am J Psychiatry* 2004;**161**:2295-2303.
- 11 Meltzer H, Griffiths C, Brock A, et al. Patterns of suicide by occupation in England and Wales. *Br J Psychiatry* 2008;**193**:73-76.

1  
2  
3 12 Tyssen R, Hem E, Gude T, et al. Lower life satisfaction in physicians compared with  
4 a general population sample: A 10-year longitudinal nationwide study of course and  
5 predictors. *Soc Psychiatry Psychiatr Epidemiol* 2009;**44**:47-54.  
6  
7

8  
9 13 Firth-Cozens J, Greenhalgh J. Doctors' perceptions of the links between stress and  
10 lowered clinical care. *Soc Sci Med* 1997;**44**:1017-1022.  
11

12  
13 14 Brown R, Dunn S, Byrnes K, et al. Doctors' stress responses and poor  
14 communication performance in simulated bad-news consultations. *Acad Med*.  
15  
16 2009;**84**:1595.  
17

18  
19 15 Dyrbye LN, Thomas MR, Shanafelt TD. Systematic review of depression, anxiety  
20 and other indicators of psychological distress among US and Canadian medical  
21 students. *Acad Med* 2006;**81**:354-373.  
22  
23

24  
25 16 Pickard M, Bates L, Dorian M, et al. Alcohol and drug use in second year medical  
26 students at the University of Leeds. *Med Educ* 2000;**34**:148-150.  
27  
28

29  
30 17 Karaoglu N, Seker M., Anxiety and depression in medical students related to desire  
31 for and expectations from a medical career. *West Indian Med J* 2010;**59**:196-202.  
32  
33

34  
35 18 Curran TA, Gawley E, Casey P, et al. Depression, suicidality and alcohol abuse  
36 among medical and business students. *Ir Med J* 2009;**102**:249-252.  
37  
38

39  
40 19 Bunevicius A, Katkute A, Bunevicius R. Symptoms of anxiety and depression in  
41 medical students and in humanities students: Relationship with Big-Five personality  
42 dimensions and vulnerability to stress. *Int J Soc Psychiatry* 2008;**54**:494-501.  
43  
44

45  
46 20 Dahlin ME, Joneborg N, Runeson B. Stress and depression among medical students:  
47 a cross-sectional study. *Med Educ* 2005;**39**:594-604.  
48  
49

50  
51 21 Kessler RC. Epidemiology of women and depression. *J Affect Disord* 2003;**74**:5-13.  
52

53  
54 22 Sreeramareddy CT, Shankar PR, Binu VS, et al. Psychological morbidity, sources of  
55 stress and coping strategies among undergraduate medical students of Nepal. *BMC Med*  
56  
57 *Educ* 2007;**7**:26.  
58  
59

- 1  
2  
3 23 Mancevska S, Bozinovska L, Tecce J, et al. Depression, anxiety and substance use in  
4  
5 medical students in the Republic of Macedonia. *Bratisl Lek Listy* 2008;**109**:568-572.  
6  
7 24 Rosal MC, Ockene IS, Ockene JK, et al. A longitudinal study of students' depression  
8  
9 at one medical school. *Acad Med.* 1997;**72**:542-546.  
10  
11 25 Guthrie E, Black D, Bagalkote H, et al. Psychological stress and burnout in medical  
12  
13 students : a five-year prospective longitudinal study. *J Royal Soc Med* 1998;**91**:237-243.  
14  
15 26 Dahlin ME, Runeson B. Burnout and psychiatric morbidity among medical students  
16  
17 entering clinical training: a three year prospective questionnaire and interview based  
18  
19 study. *BMC Med Educ* 2007;**7**:6.  
20  
21 27 Zigmond AS, Snaith RP, The Hospital Anxiety and Depression Scale. *Acta Psychiatr*  
22  
23 *Scand* 1983;**67**:361-370.  
24  
25 28 Brennan C, Worrall-Davies A, McMillan D, et al. The Hospital Anxiety and  
26  
27 Depression Scale: A diagnostic meta-analysis of case-finding ability. *J Psychosom Res*  
28  
29 2010;**69**:371-378.  
30  
31 29 Bjelland I, Dahl AA, Tangen Haug T, et al. The validity of the Hospital Anxiety and  
32  
33 Depression Scale: An updated literature review. *J Psychosom Res* 2002;**52**:69-77.  
34  
35 30 Green MJ, Benzeval M. Ageing, social class and common mental disorders:  
36  
37 longitudinal evidence from three cohorts in the West of Scotland. *Psychol Med*  
38  
39 2011;**41**:565-574.  
40  
41 31 Mallen C, Mottram S, Thomas E. Birth factors and common mental health problems  
42  
43 in young adults. *Soc Psychiatr Epidemiol* 2008;**43**:325-330.  
44  
45 32 Webb E, Ashton CH, Kelly P, et al. Alcohol and drug use in UK university students.  
46  
47 *Lancet* 1996;**348**:922-5.  
48  
49 33 Andrews B, Wilding JM. The relation of depression and anxiety to life-stress and  
50  
51 achievement in students. *Br J Psychol* 2004;**95**:509-521.  
52  
53  
54  
55  
56  
57  
58  
59  
60

1  
2  
3 34 Woolf K, Cave J, McManus C, et al. 'It gives you an understanding you can't get  
4 from any book.' The relationship between medical students' and doctors' personal  
5 illness experiences and their performance: a qualitative and quantitative study. *BMC*  
6 *Med Educ* 2007;**7**:50.

7  
8  
9  
10  
11 35 Ashton CH, Kamali F. Personality, lifestyles, alcohol and drug consumption in a  
12 sample of British medical students. *Med Educ* 1995;**29**:187-192.

13  
14 36 Caplan RP, Stress, anxiety and depression in hospital consultants, general  
15 practitioners and senior health service managers. *BMJ* 1994;**309**:1261-1263.

16  
17  
18 37 Chambers R, Campbell I. Anxiety and depression in general practitioners:  
19 associations with type of practice, fundholding, gender and other personal  
20 characteristics. *Fam Pract* 1996;**13**:170-173.

21  
22  
23 38 Andrews B, Hejdenberg J, Wilding J. Student anxiety and depression: Comparison  
24 of questionnaire and interview assessments. *J Affect Disord* 2006;**95**:29-34

25  
26  
27 39 Altman DG, Machin D, Bryant TN, et al. Proportions and their differences. In:  
28 Altman DG, Machin D, Bryant TN, Gardner MJ eds. *Statistics with confidence*. 2nd ed.  
29 London: BMJ Books, 2000:45-56.

30  
31  
32 40 R Development Core Team (2011). R: A language and environment for statistical  
33 computing. R Foundation for Statistical Computing, Vienna, Austria. ISBN 3-900051-  
34 07-0, URL <http://www.R-project.org/>.)

35  
36  
37 41 Skinner R, Conlon L, McDonald C. Cannabis use and non-clinical dimensions of  
38 psychosis in university students presenting to primary care. *Acta Psychiatr Scand*  
39 2011;**123**:21-27.

40  
41  
42 42 Heffernan T, Clark R, Bartholomew J, et al. Does binge drinking in teenagers affect  
43 their everyday prospective memory? *Drug Alcohol Depend* 2010;**109**:73-78.

44  
45  
46 43 Matsudaira T, Kitamura T. Personality traits as risk factors of depression and anxiety  
47 among Japanese students. *J Clin Psychol* 2006;**62**:97-109.

- 1  
2  
3 44 Augestad LB, Slettemoen RP, Flanders WD. Physical activity and depressive  
4 symptoms among Norwegian adults aged 20-50. *Public Health Nurs* 2008;**25**:536-545.  
5  
6  
7 45 Collins IP, Paykel ES. Suicide amongst Cambridge University students 1970-1996.  
8  
9 *Soc Psychiatr Epidemiol* 2000;**35**:128-132.  
10  
11 46 Newbury-Birch D, Lowry RJ, Kamali F. The changing patterns of drinking. Illicit  
12 drug use, stress, anxiety and depression in dental students in a UK dental school: a  
13 longitudinal study. *Br Dent J* 2002;**192**:646-649.  
14  
15  
16 47 Caci H, Baylé FJ, Mattei V, et al. How does the Hospital Anxiety and Depression  
17 Scale measure anxiety and depression in health subjects? *Psychiatry Res* 2003;**118**:89-  
18 99.  
19  
20  
21 48 Zoccolillo M, Murphy GE, Wetzel RD. Depression among medical students. *J Affect*  
22 *Disord* 1986;**11**:91-96.  
23  
24  
25 49 Zivin K, Eisenberg D, Gollust SE, et al. Persistence of mental health problems and  
26 needs in a college student population. *J Affect Disord* 2009;**117**:180-185.  
27  
28  
29 50 Levine RE, Breitkopf CR, Sierles FS, et al. Complications associated with surveying  
30 medical student depression. *Acad Psychiatry* 2003;**27**:12-18.  
31  
32  
33 51 Enns MW, Cox BJ, Sareen J, et al. Adaptive and maladaptive perfectionism in  
34 medical students: a longitudinal investigation. *Med Educ* 2001;**35**:1034-1042.  
35  
36  
37 52 O'Connor LE, Berry JW, Weiss J, et al. Guilt, fear, submission and empathy in  
38 depression. *J Affect Disord* 2002;**71**:19-27.  
39  
40  
41  
42  
43  
44  
45  
46  
47  
48  
49  
50  
51  
52  
53  
54  
55  
56  
57  
58  
59  
60

## STROBE Statement—checklist of items that should be included in reports of observational studies

|                              | Item No | Recommendation                                                                                                                                                                             |
|------------------------------|---------|--------------------------------------------------------------------------------------------------------------------------------------------------------------------------------------------|
| <b>Title and abstract</b>    | 1✓      | (a) Indicate the study's design with a commonly used term in the title or the abstract                                                                                                     |
|                              | ✓       | (b) Provide in the abstract an informative and balanced summary of what was done and what was found                                                                                        |
| <b>Introduction</b>          |         |                                                                                                                                                                                            |
| Background/rationale         | 2✓      | Explain the scientific background and rationale for the investigation being reported                                                                                                       |
| Objectives                   | 3✓      | State specific objectives, including any prespecified hypotheses                                                                                                                           |
| <b>Methods</b>               |         |                                                                                                                                                                                            |
| Study design                 | 4✓      | Present key elements of study design early in the paper                                                                                                                                    |
| Setting                      | 5✓      | Describe the setting, locations, and relevant dates, including periods of recruitment, exposure, follow-up, and data collection                                                            |
| Participants                 | 6✓      | (a) <i>Cohort study</i> —Give the eligibility criteria, and the sources and methods of selection of participants. Describe methods of follow-up                                            |
|                              |         | <i>Case-control study</i> —Give the eligibility criteria, and the sources and methods of case ascertainment and control selection. Give the rationale for the choice of cases and controls |
|                              |         | <i>Cross-sectional study</i> —Give the eligibility criteria, and the sources and methods of selection of participants                                                                      |
|                              |         | (b) <i>Cohort study</i> —For matched studies, give matching criteria and number of exposed and unexposed                                                                                   |
|                              |         | <i>Case-control study</i> —For matched studies, give matching criteria and the number of controls per case                                                                                 |
| Variables                    | 7✓      | Clearly define all outcomes, exposures, predictors, potential confounders, and effect modifiers. Give diagnostic criteria, if applicable                                                   |
| Data sources/<br>measurement | 8*✓     | For each variable of interest, give sources of data and details of methods of assessment (measurement). Describe comparability of assessment methods if there is more than one group       |
| Bias                         | 9✓      | Describe any efforts to address potential sources of bias                                                                                                                                  |
| Study size                   | 10✓     | Explain how the study size was arrived at                                                                                                                                                  |
| Quantitative variables       | 11✓     | Explain how quantitative variables were handled in the analyses. If applicable, describe which groupings were chosen and why                                                               |
| Statistical methods          | 12✓     | (a) Describe all statistical methods, including those used to control for confounding                                                                                                      |
|                              |         | ✓ (b) Describe any methods used to examine subgroups and interactions                                                                                                                      |
|                              |         | ✓ (c) Explain how missing data were addressed                                                                                                                                              |
|                              |         | (d) <i>Cohort study</i> —If applicable, explain how loss to follow-up was addressed                                                                                                        |
|                              |         | <i>Case-control study</i> —If applicable, explain how matching of cases and controls was addressed                                                                                         |
|                              |         | <i>Cross-sectional study</i> —If applicable, describe analytical methods taking account of sampling strategy                                                                               |
|                              | ✓       | (e) Describe any sensitivity analyses                                                                                                                                                      |

Continued on next page



**Results**

|                  |      |                                                                                                                                                                                                                                                                                                                                                                                                               |
|------------------|------|---------------------------------------------------------------------------------------------------------------------------------------------------------------------------------------------------------------------------------------------------------------------------------------------------------------------------------------------------------------------------------------------------------------|
| Participants     | 13*✓ | (a) Report numbers of individuals at each stage of study—eg numbers potentially eligible, examined for eligibility, confirmed eligible, included in the study, completing follow-up, and analysed<br>(b) Give reasons for non-participation at each stage<br>(c) Consider use of a flow diagram                                                                                                               |
| Descriptive data | 14*✓ | (a) Give characteristics of study participants (eg demographic, clinical, social) and information on exposures and potential confounders<br>(b) Indicate number of participants with missing data for each variable of interest<br>(c) <i>Cohort study</i> —Summarise follow-up time (eg, average and total amount)                                                                                           |
| Outcome data     | 15*✓ | <i>Cohort study</i> —Report numbers of outcome events or summary measures over time<br><i>Case-control study</i> —Report numbers in each exposure category, or summary measures of exposure<br><i>Cross-sectional study</i> —Report numbers of outcome events or summary measures                                                                                                                             |
| Main results     | 16✓  | (a) Give unadjusted estimates and, if applicable, confounder-adjusted estimates and their precision (eg, 95% confidence interval). Make clear which confounders were adjusted for and why they were included<br>(b) Report category boundaries when continuous variables were categorized<br>(c) If relevant, consider translating estimates of relative risk into absolute risk for a meaningful time period |
| Other analyses   | 17✓  | Report other analyses done—eg analyses of subgroups and interactions, and sensitivity analyses                                                                                                                                                                                                                                                                                                                |

**Discussion**

|                  |     |                                                                                                                                                                            |
|------------------|-----|----------------------------------------------------------------------------------------------------------------------------------------------------------------------------|
| Key results      | 18✓ | Summarise key results with reference to study objectives                                                                                                                   |
| Limitations      | 19✓ | Discuss limitations of the study, taking into account sources of potential bias or imprecision. Discuss both direction and magnitude of any potential bias                 |
| Interpretation   | 20✓ | Give a cautious overall interpretation of results considering objectives, limitations, multiplicity of analyses, results from similar studies, and other relevant evidence |
| Generalisability | 21✓ | Discuss the generalisability (external validity) of the study results                                                                                                      |

**Other information**

|         |     |                                                                                                                                                               |
|---------|-----|---------------------------------------------------------------------------------------------------------------------------------------------------------------|
| Funding | 22✓ | Give the source of funding and the role of the funders for the present study and, if applicable, for the original study on which the present article is based |
|---------|-----|---------------------------------------------------------------------------------------------------------------------------------------------------------------|

\*Give information separately for cases and controls in case-control studies and, if applicable, for exposed and unexposed groups in cohort and cross-sectional studies.

**Note:** An Explanation and Elaboration article discusses each checklist item and gives methodological background and published examples of transparent reporting. The STROBE checklist is best used in conjunction with this article (freely available on the Web sites of PLoS Medicine at <http://www.plosmedicine.org/>, Annals of Internal Medicine at <http://www.annals.org/>, and Epidemiology at <http://www.epidem.com/>). Information on the STROBE Initiative is available at [www.strobe-statement.org](http://www.strobe-statement.org).

1  
2  
3 Dear Dr. Quince  
4

5 MED-2012-0224

6 Depression among undergraduate medical students at one UK medical school.  
7

8 Thank you for submitting your paper to Medical Education. I read it with great interest but I am afraid I  
9 am not able to offer publication.  
10

11 With such a substantial literature already outlining the prevalence of depression and other clinical issues  
12 amongst medical students as well as examining which variables relate to prevalence rates it is difficult to  
13 discern what substantive advance is offered by the findings included in this report.  
14

15  
16 As you will appreciate we receive many more papers than we can accept and have to make some careful  
17 decisions about what to publish. This means making some difficult decisions based on originality,  
18 importance and academic rigour. I am sorry we cannot find space for your paper.  
19

20 Thank you for giving us the opportunity to consider your work. Despite this disappointing outcome, I  
21 wish you every success with your continued research and educational activities.  
22

23  
24 Yours sincerely,

25  
26 Dr Kevin Eva  
27 Editor in Chief  
28 Medical Education  
29  
30  
31  
32  
33  
34  
35  
36  
37  
38  
39  
40  
41  
42  
43  
44  
45  
46  
47  
48  
49  
50  
51  
52  
53  
54  
55  
56  
57  
58  
59  
60
